# Supplementary material for: Two-dimensional oxide quasicrystal approximants with tunable electronic and magnetic properties
Source: Royal Society of Chemistry journal article supplement (doi:10.1039/d1nr02407h), 2021-01-01
Supplement: d1nr02407h3.pdf [file d1nr02407h3.pdf]

# Two-dimensional oxide quasicrystal approximants with tunable electronic and magnetic properties

## Supporting information

Thiago T. Dorini<sup>a,b</sup>, Florian Brix<sup>a,b</sup>, Corentin Chatelier<sup>a,b</sup>, Anton Kokalj<sup>b,c</sup>, Émilie Gaudry<sup>\*a,b</sup>

### Structure of the OQA/Me

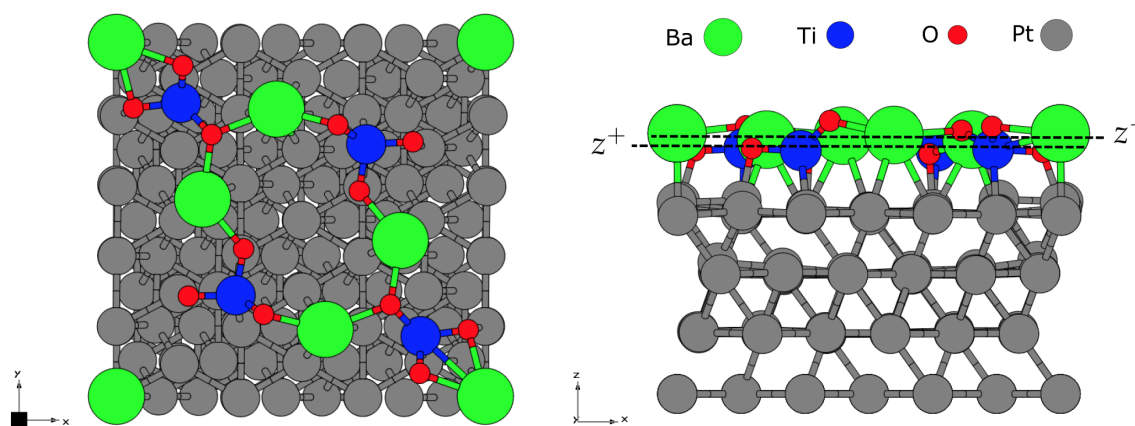

Figure S1: Top and side views of the relaxed BaTiO<sub>3</sub>/Pt(111) structure.

<sup>a</sup> Université de Lorraine, CNRS, Institut Jean Lamour – UMR 7198, F-54011, Nancy, France. E-mail: [Emilie.Gaudry@univ-lorraine.fr](mailto:Emilie.Gaudry@univ-lorraine.fr)

<sup>b</sup> International Associated Laboratory PACS2, CNRS Université de Lorraine, Nancy, France

<sup>c</sup> Jožef Stefan Institute, Jamova cesta 39, 1000 Ljubljana, Slovenia

<sup>a</sup> Université de Lorraine, CNRS, Institut Jean Lamour – UMR 7198, F-54011, Nancy, France. E-mail: [Emilie.Gaudry@univ-lorraine.fr](mailto:Emilie.Gaudry@univ-lorraine.fr)

<sup>b</sup> International Associated Laboratory PACS2, CNRS Université de Lorraine, Nancy, France

<sup>c</sup> Jožef Stefan Institute, Jamova cesta 39, 1000 Ljubljana, Slovenia

# Formation enthalpies

## Freestanding layers

Reaction 0 ( $r_0$ ): Oxide Quasicrystal Approximant (OQA):  $5/2 \text{ Ba} + 4B + 6\text{O}_2 \rightarrow \text{Ba}_5B_4\text{O}_{12}$

Reaction 0' ( $r'_0$ ): Single-layer Oxide Honeycomb Structure (SHS) :  $\text{Ba} + 4B + 3\text{O}_2 \rightarrow \text{BaB}_4\text{O}_6$

Table S1: Formation enthalpies ( $T = 0 \text{ K}$ ) of the freestanding layers.

|                       | BaTiO <sub>3</sub> | SrTiO <sub>3</sub> | BaFeO <sub>3</sub> | BaCoO <sub>3</sub> | BaNiO <sub>3</sub> |
|-----------------------|--------------------|--------------------|--------------------|--------------------|--------------------|
| $\Delta H_f$ (eV/at.) | -2.02              | -2.04              | -1.14              | -1.12              | -0.84              |
|                       | OQA                |                    |                    |                    |                    |
| $\Delta H_f$ (eV/at.) | -1.05              | -1.20              | 0.00               | -0.40              | 0.38               |
|                       | SHS                |                    |                    |                    |                    |

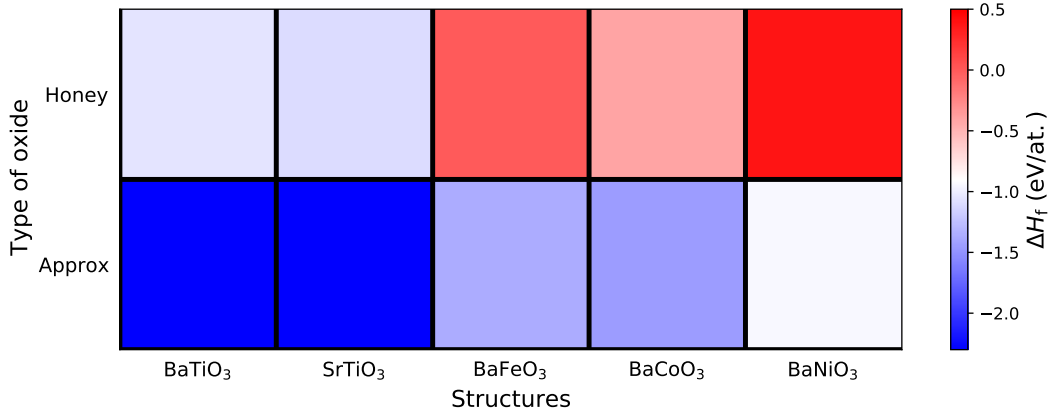

Figure S2: Formation enthalpies ( $T = 0 \text{ K}$ ), according to  $r_0$  and  $r'_0$ .

## Supported layers

Reaction 1 (r1): Oxide Quasicrystal Approximant (OQA):  $5\text{Ba} + 4\text{B} + 6\text{O}_2 + \text{Pt}_{120} \rightarrow \text{Pt}_{120}\text{Ba}_5\text{B}_4\text{O}_{12}$

Reaction 2 (r2): Thick Perovskite Film (TPF) :  $8\text{Ba} + 6\text{B} + 6\text{O}_2 + \text{Pt}_{32} \rightarrow \text{Pt}_{32}\text{Ba}_8\text{B}_6\text{O}_{24}$

Reaction 3 (r3): Single-layer Oxide Honeycomb Structure (SHS) :  $\text{Ba} + 4\text{B} + 3\text{O}_2 + \text{Pt}_{32} \rightarrow \text{Pt}_{32}\text{BaB}_4\text{O}_6$

Table S2: Formation enthalpy of the supported OQA ( $T = 0$  K), according to  $5\text{Ba} + 4\text{B} + 6\text{O}_2 + \text{Pt}_{120} \rightarrow \text{Pt}_{120}\text{Ba}_5\text{B}_4\text{O}_{12}$

|                       | BaTiO <sub>3</sub> /Me | SrTiO <sub>3</sub> /Me | BaFeO <sub>3</sub> /Me | BaCoO <sub>3</sub> /Me | BaNiO <sub>3</sub> /Me |
|-----------------------|------------------------|------------------------|------------------------|------------------------|------------------------|
| $\Delta H_f$ (eV/at.) | -0.42                  | -0.41                  | Pt substrate<br>-0.24  | -0.26                  | 0.20                   |
| $\Delta H_f$ (eV/at.) | -0.42                  | -0.42                  | Au substrate<br>-0.24  | -0.24                  | -0.17                  |

Table S3: Formation enthalpy of the supported TPF ( $T = 0$  K) according to  $8\text{Ba} + 6\text{B} + 6\text{O}_2 + \text{Pt}_{32} \rightarrow \text{Pt}_{32}\text{Ba}_8\text{B}_6\text{O}_{24}$

|                        | BaTiO <sub>3</sub> /Me | SrTiO <sub>3</sub> /Me | BaFeO <sub>3</sub> /Me | BaCoO <sub>3</sub> /Me | BaNiO <sub>3</sub> /Me |
|------------------------|------------------------|------------------------|------------------------|------------------------|------------------------|
| $\Delta H_f$ (eV/f.u.) | -1.52                  | -1.56                  | Pt substrate<br>-0.94  | -0.99                  | -0.79                  |
| $\Delta H_f$ (eV/f.u.) | -1.48                  | -1.50                  | Au substrate<br>-0.91  | -0.92                  | -0.73                  |

Table S4: Formation enthalpy of the supported SHS ( $T = 0$  K) according to  $\text{Ba} + 4\text{B} + 3\text{O}_2 + \text{Pt}_{32} \rightarrow \text{Pt}_{32}\text{BaB}_4\text{O}_6$

|                       | BaTiO <sub>3</sub> /Me | SrTiO <sub>3</sub> /Me | BaFeO <sub>3</sub> /Me | BaCoO <sub>3</sub> /Me | BaNiO <sub>3</sub> /Me |
|-----------------------|------------------------|------------------------|------------------------|------------------------|------------------------|
| $\Delta H_f$ (eV/at.) | -0.84                  | -0.83                  | Pt substrate<br>-0.28  | -0.31                  | -0.11                  |
| $\Delta H_f$ (eV/at.) | -0.72                  | -0.72                  | Au substrate<br>-0.24  | -0.28                  | -0.09                  |

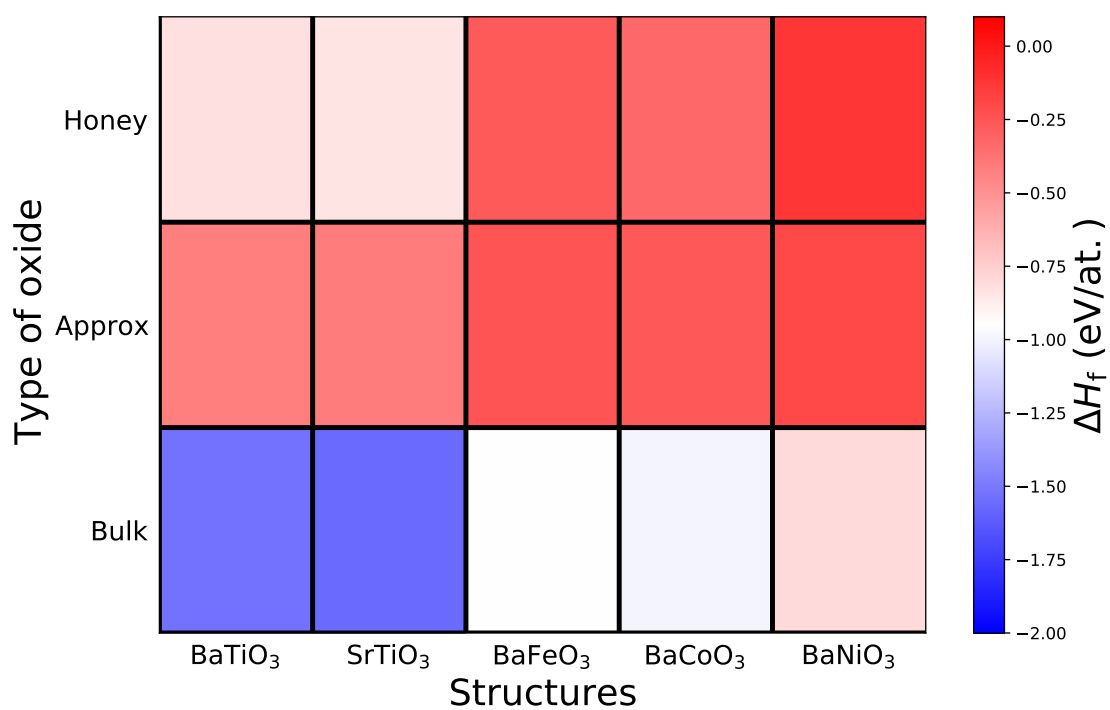

Figure S3: Formation enthalpies ( $T = 0$  K), according to r1, r2, r3 with the Pt substrate.



## Properties of OQA films

Table S5: BaBO<sub>3</sub>/Me(111) systems ( $B = \text{Ti, V, Cr, Mn, Fe, Co, Ni}$  and  $\text{Me} = \text{Pt, Pd, Au}$ ) : film rumplings ( $R$ ), Bader charges ( $Q$ ), enthalpies of formation at 0 K ( $\Delta H_f$ ), adhesion energies ( $E_{\text{adh}}$ ), lattice mismatch, work function differences ( $\Delta W$ ), dipole moments in the surface normal direction  $z$  ( $D_z$ ), and atomic magnetic moments ( $m$ ). Bader charges are expressed in units of elementary charge (e), positive charges indicate cations.  $Q_{\text{Me}}$  corresponds to the average charge of Me atoms in the topmost metal layer of Me(111).  $Q_B$  and  $m_B$  stand for Bader charge and magnetic moment of atom  $B$  of ABO<sub>3</sub>, respectively. MS stands for the ground-state spin order (NM  $\equiv$  non-magnetic, FM  $\equiv$  ferromagnetic, and AFM  $\equiv$  anti ferromagnetic).

|                                         | BaTiO <sub>3</sub> | BaVO <sub>3</sub> | BaCrO <sub>3</sub> | BaMnO <sub>3</sub> | BaFeO <sub>3</sub> | BaCoO <sub>3</sub> | BaNiO <sub>3</sub> |
|-----------------------------------------|--------------------|-------------------|--------------------|--------------------|--------------------|--------------------|--------------------|
| Freestanding layer                      |                    |                   |                    |                    |                    |                    |                    |
| $Q_{\text{Ba}}$ (e)                     | 1.58               | 1.60              | /                  | /                  | 1.63               | 1.63               | 1.63               |
| $Q_B$ (e)                               | 1.96               | 1.39              | /                  | /                  | 1.18               | 1.13               | 1.05               |
| $Q_{\text{O}}$ (e)                      | -1.31              | -1.13             | /                  | /                  | -1.07              | -1.06              | -1.03              |
| $m_B$ ( $\mu_{\text{B}}$ )              | 0.2                | 0.5               | /                  | /                  | 2.5                | 1.4                | 0.11               |
| Pt substrate                            |                    |                   |                    |                    |                    |                    |                    |
| $R$ ( $\text{\AA}$ )                    | -0.17              | -0.27             | -0.19              | /                  | -0.06              | 0.11               | 0.21               |
| $Q_{\text{Ba}}$ (e)                     | 1.54               | 1.53              | 1.50               | /                  | 1.52               | 1.54               | 1.51               |
| $Q_B$ (e)                               | 1.98               | 1.71              | 1.76               | /                  | 1.37               | 1.16               | 0.94               |
| $Q_{\text{O}}$ (e)                      | -1.09              | -0.94             | -0.97              | /                  | -0.97              | -0.98              | -0.95              |
| $Q_{\text{Pt}}$ (e)                     | -0.10              | -0.12             | -0.11              | /                  | -0.07              | -0.03              | 0.00               |
| $\Delta H_f$ (eV)                       | -0.42              | -0.36             | -0.15              | /                  | -0.24              | -0.26              | -0.21              |
| $E_{\text{adh}}$ (meV/ $\text{\AA}^2$ ) | -81.73             | -81.56            | /                  | /                  | -50.96             | -67.53             | -50.76             |
| <i>mismatch</i> (%)                     | 32.20              | 25.75             | /                  | /                  | 31.20              | 26.06              | 27.07              |
| $\Delta W$ (eV)                         | 2.01               | 2.15              | 2.20               | /                  | 2.18               | 2.25               | 2.25               |
| $D_z$ ( $e\text{\AA}$ )                 | -2.12              | -2.37             | -2.85              | /                  | -2.44              | -2.62              | -2.76              |
| $m_B$ ( $\mu_{\text{B}}$ )              | 0.0                | 0.0               | 0.03               | /                  | 3.32               | 0.04               | 0.67               |
| MS                                      | NM                 | NM                | AFM                | /                  | FM                 | AFM                | AFM                |
| Pd substrate                            |                    |                   |                    |                    |                    |                    |                    |
| $R$ ( $\text{\AA}$ )                    | -0.11              | -0.23             | -0.18              | 0.03               | 0.07               | 0.25               | 0.31               |
| $Q_{\text{Ba}}$ (e)                     | 1.51               | 1.50              | 1.48               | 1.51               | 1.50               | 1.51               | 1.49               |
| $Q_B$ (e)                               | 1.96               | 1.68              | 1.73               | 1.57               | 1.51               | 1.21               | 0.96               |
| $Q_{\text{O}}$ (e)                      | -1.12              | -0.95             | -0.97              | -1.04              | -0.94              | -0.98              | -0.91              |
| $Q_{\text{Pd}}$ (e)                     | -0.07              | -0.09             | -0.08              | -0.04              | -0.05              | -0.02              | 0.01               |
| $\Delta H_f$ (eV)                       | -0.41              | -0.35             | -0.14              | -0.23              | -0.24              | -0.26              | -0.20              |
| $E_{\text{adh}}$ (meV/ $\text{\AA}^2$ ) | -78.08             | -75.99            | /                  | /                  | -50.06             | -68.46             | -55.29             |
| <i>mismatch</i> (%)                     | 30.95              | 24.21             | /                  | /                  | 29.94              | 24.70              | 25.74              |
| $\Delta W$ (eV)                         | 2.16               | 2.19              | 2.21               | 2.21               | 2.20               | 2.22               | 2.20               |
| $D_z$ ( $e\text{\AA}$ )                 | -1.85              | -2.07             | -2.30              | -2.30              | -2.21              | -2.56              | -2.29              |
| $m_B$ ( $\mu_{\text{B}}$ )              | 0.0                | 0.0               | 0.59               | 0.92               | 3.58               | 2.57               | 0.03               |
| MS                                      | NM                 | NM                | AFM                | AFM                | FM                 | FM                 | AFM                |
| Au substrate                            |                    |                   |                    |                    |                    |                    |                    |
| $R$ ( $\text{\AA}$ )                    | -0.16              | -0.36             | /                  | -0.03              | 0.03               | 0.17               | 0.21               |
| $Q_{\text{Ba}}$ (e)                     | 1.58               | 1.57              | /                  | 1.57               | 1.56               | 1.55               | 1.54               |
| $Q_B$ (e)                               | 2.00               | 1.74              | /                  | 1.57               | 1.31               | 1.19               | 0.92               |
| $Q_{\text{O}}$ (e)                      | -1.14              | -0.97             | /                  | -1.09              | -1.03              | -1.00              | -0.99              |
| $Q_{\text{Au}}$ (e)                     | -0.08              | -0.11             | /                  | -0.07              | -0.06              | -0.04              | 0.00               |
| $\Delta H_f$ (eV)                       | -0.42              | -0.35             | /                  | -0.24              | -0.24              | -0.24              | -0.18              |
| $E_{\text{adh}}$ (meV/ $\text{\AA}^2$ ) | -76.72             | -68.72            | /                  | /                  | -45.03             | -49.00             | -32.54             |
| <i>mismatch</i> (%)                     | 38.22              | 32.18             | /                  | /                  | 37.32              | 32.62              | 33.55              |
| $\Delta W$ (eV)                         | 2.12               | 2.15              | /                  | 2.15               | 2.17               | 2.17               | 2.20               |
| $D_z$ ( $e\text{\AA}$ )                 | -1.58              | -1.94             | /                  | -1.95              | -2.25              | -2.13              | -2.46              |
| $m_B$ ( $\mu_{\text{B}}$ )              | 0.0                | 0.0               | /                  | 1.17               | 3.40               | 2.76               | 0.05               |
| MS                                      | NM                 | NM                | /                  | AFM                | FM                 | FM                 | AFM                |

Table S6: SrBO<sub>3</sub>/Me(111) systems ( $B = \text{Ti, V, Cr, Mn, Fe, Co, Ni}$  and  $\text{Me} = \text{Pt, Pd, Au}$ ) : film rumplings ( $R$ ), Bader charges ( $Q$ ), enthalpies of formation at 0 K ( $\Delta H_f$ ), adhesion energies ( $E_{\text{adh}}$ ), lattice mismatch, work function differences ( $\Delta W$ ), dipole moments in the surface normal direction  $z$  ( $D_z$ ), and atomic magnetic moments ( $m$ ). Bader charges are expressed in units of elementary charge (e), positive charges indicate cations.  $Q_{\text{Me}}$  corresponds to the average charge of Me atoms in the topmost metal layer of Me(111).  $Q_B$  and  $m_B$  stand for Bader charge and magnetic moment of atom  $B$  of ABO<sub>3</sub>, respectively. MS stands for the ground-state spin order (NM  $\equiv$  non-magnetic, FM  $\equiv$  ferromagnetic, and AFM  $\equiv$  anti ferromagnetic).

|                                         | SrTiO <sub>3</sub> | SrVO <sub>3</sub> | SrCrO <sub>3</sub> | SrMnO <sub>3</sub> | SrFeO <sub>3</sub> | SrCoO <sub>3</sub> | SrNiO <sub>3</sub> |
|-----------------------------------------|--------------------|-------------------|--------------------|--------------------|--------------------|--------------------|--------------------|
| Freestanding layer                      |                    |                   |                    |                    |                    |                    |                    |
| $Q_{\text{Sr}}$ (e)                     | 1.60               | 1.61              | 1.63               | 1.62               | /                  | /                  | 1.61               |
| $Q_B$ (e)                               | 1.90               | 1.44              | 1.61               | 1.60               | /                  | /                  | 1.12               |
| $Q_{\text{O}}$ (e)                      | -1.30              | -1.15             | -1.14              | -1.21              | /                  | /                  | -1.04              |
| $m_B$ ( $\mu_B$ )                       | 0.1                | 0.4               | 1.39               | 0.0                | /                  | /                  | 0.9                |
| Pt substrate                            |                    |                   |                    |                    |                    |                    |                    |
| $R$ ( $\text{\AA}$ )                    | -0.22              | -0.29             | -0.25              | -0.05              | -0.12              | -0.05              | 0.20               |
| $Q_{\text{Sr}}$ (e)                     | 1.56               | 1.56              | 1.54               | 1.56               | 1.57               | 1.57               | 1.57               |
| $Q_B$ (e)                               | 1.99               | 1.71              | 1.77               | 1.55               | 1.36               | 1.25               | 0.92               |
| $Q_{\text{O}}$ (e)                      | -1.10              | -0.95             | -0.98              | -1.05              | -0.98              | -0.99              | -0.94              |
| $Q_{\text{Pt}}$ (e)                     | -0.10              | -0.12             | -0.11              | -0.06              | -0.07              | -0.05              | -0.04              |
| $\Delta H_f$ (eV)                       | -0.40              | -0.35             | -0.14              | -0.24              | -0.23              | -0.25              | 0.87               |
| $E_{\text{adh}}$ (meV/ $\text{\AA}^2$ ) | -75.8              | -74.74            | -50.28             | -51.8              | /                  | /                  | -49.22             |
| <i>mismatch</i> (%)                     | 37.16              | 39.84             | 31.56              | 40.27              | /                  | /                  | 42.14              |
| $\Delta W$ (eV)                         | 2.15               | 2.20              | 2.19               | 2.16               | 2.19               | 2.21               | 2.19               |
| $D_z$ (e $\text{\AA}$ )                 | -1.65              | -2.20             | -2.43              | -1.65              | -1.93              | -1.72              | -2.11              |
| $m_B$ ( $\mu_B$ )                       | 0.00               | 0.00              | 1.17               | 3.41               | 0.14               | 0.04               | 0.32               |
| MS                                      | NM                 | NM                | FM                 | FM                 | AFM                | AFM                | AFM                |
| Pd substrate                            |                    |                   |                    |                    |                    |                    |                    |
| $R$ ( $\text{\AA}$ )                    | -0.14              | -0.27             | -0.23              | 0.1                | 0.05               | 0.23               | 0.23               |
| $Q_{\text{Sr}}$ (e)                     | 1.56               | 1.53              | 1.56               | 1.55               | 1.53               | 1.54               | 1.54               |
| $Q_B$ (e)                               | 1.97               | 1.69              | 1.69               | 1.54               | 1.35               | 1.20               | 1.04               |
| $Q_{\text{O}}$ (e)                      | -1.13              | -0.97             | -1.04              | -1.06              | -0.99              | -1.00              | -0.95              |
| $Q_{\text{Pd}}$ (e)                     | -0.02              | -0.10             | -0.07              | -0.05              | -0.05              | -0.03              | -0.03              |
| $\Delta H_f$ (eV)                       | -0.41              | -0.34             | -0.13              | -0.24              | -0.23              | -0.26              | -0.19              |
| $E_{\text{adh}}$ (meV/ $\text{\AA}^2$ ) | -74.22             | -72.49            | -45.19             | -58.1              | /                  | /                  | -38.49             |
| <i>mismatch</i> (%)                     | 36.01              | 38.74             | 30.31              | 39.18              | /                  | /                  | 41.08              |
| $\Delta W$ (eV)                         | 2.14               | 2.14              | 2.15               | 2.20               | 2.16               | 2.19               | 2.20               |
| $D_z$ (e $\text{\AA}$ )                 | -1.45              | -1.61             | -1.89              | -1.30              | -2.09              | -2.16              | -2.13              |
| $m_B$ ( $\mu_B$ )                       | 0.00               | 0.00              | 1.23               | 0.00               | 3.76               | 2.59               | 0.48               |
| MS                                      | NM                 | NM                | FM                 | FM                 | FM                 | FM                 | FM                 |
| Au substrate                            |                    |                   |                    |                    |                    |                    |                    |
| $R$ ( $\text{\AA}$ )                    | -0.19              | -0.39             | /                  | 0.07               | -0.07              | 0.11               | 0.20               |
| $Q_{\text{Sr}}$ (e)                     | 1.58               | 1.57              | /                  | 1.57               | 1.57               | 1.57               | 1.56               |
| $Q_B$ (e)                               | 1.99               | 1.73              | /                  | 1.57               | 1.34               | 1.12               | 0.95               |
| $Q_{\text{O}}$ (e)                      | -1.16              | -0.97             | /                  | -1.11              | -1.01              | -1.03              | -1.02              |
| $Q_{\text{Au}}$ (e)                     | -0.08              | -0.11             | /                  | -0.03              | -0.05              | -0.02              | 0.00               |
| $\Delta H_f$ (eV)                       | -0.42              | -0.36             | /                  | -0.24              | -0.22              | -0.23              | -0.18              |
| $E_{\text{adh}}$ (meV/ $\text{\AA}^2$ ) | -75.56             | -74.64            | /                  | -50.43             | /                  | /                  | -24.93             |
| <i>mismatch</i> (%)                     | 42.74              | 45.19             | /                  | 45.58              | /                  | /                  | 47.28              |
| $\Delta W$ (eV)                         | 2.10               | 2.13              | /                  | 2.14               | 2.12               | 2.14               | 2.15               |
| $D_z$ (e $\text{\AA}$ )                 | -1.28              | -1.60             | /                  | -1.58              | -1.58              | -1.67              | -1.92              |
| $m_B$ ( $\mu_B$ )                       | 0.00               | 0.00              | /                  | 0.00               | 1.50               | 0.11               | 0.44               |
| MS                                      | NM                 | NM                | /                  | AFM                | AFM                | AFM                | FM                 |

Table S7:  $\text{CaBO}_3/\text{Me}(111)$  systems ( $B = \text{Ti, V, Cr, Mn, Fe, Co, Ni}$  and  $\text{Me} = \text{Pt, Pd, Au}$ ) : film rumplings ( $R$ ), Bader charges ( $Q$ ), enthalpies of formation at 0K ( $H_{\text{for}}$ ), adhesion energies ( $E_{\text{madh}}$ ), lattice mismatch, work function differences ( $\Delta W$ ), dipole moments in the  $z$  direction ( $D_z$ ), and atomic magnetic moments ( $m$ ). Bader charges are expressed in units of elementary charge (e), positive charges indicate cations.  $Q_{\text{Me}}$  corresponds to the average charge of Me atoms in the topmost metal layer of Me(111).  $Q_B$  and  $m_B$  stands for Bader charge and magnetic moment of atom  $B$  of  $\text{ABO}_3$ . MS stands for the ground-state spin order

|                                        | CaTiO <sub>3</sub> | CaVO <sub>3</sub> | CaCrO <sub>3</sub> | CaMnO <sub>3</sub> | CaFeO <sub>3</sub> | CaCoO <sub>3</sub> | CaNiO <sub>3</sub> |
|----------------------------------------|--------------------|-------------------|--------------------|--------------------|--------------------|--------------------|--------------------|
| Freestanding layer                     |                    |                   |                    |                    |                    |                    |                    |
| $Q_{\text{Ca}}$ (e)                    | 1.55               | /                 | /                  | 1.57               | /                  | 1.58               | /                  |
| $Q_B$ (e)                              | 1.94               | /                 | /                  | 1.64               | /                  | 1.32               | /                  |
| $Q_{\text{O}}$ (e)                     | -1.29              | /                 | /                  | -1.20              | /                  | -1.10              | /                  |
| $m_B$ ( $\mu_B$ )                      | 0.3                | /                 | /                  | 0.0                | /                  | 2.3                | /                  |
| Pt substrate                           |                    |                   |                    |                    |                    |                    |                    |
| $R$ (Å)                                | -0.24              | -0.35             | -0.31              | /                  | -0.04              | 0.07               | 0.14               |
| $Q_{\text{Ca}}$ (e)                    | 1.53               | 1.53              | 1.51               | /                  | 1.54               | 1.54               | 1.54               |
| $Q_B$ (e)                              | 2.01               | 1.73              | 1.78               | /                  | 1.40               | 1.25               | 1.05               |
| $Q_{\text{O}}$ (e)                     | -1.10              | -0.94             | -0.97              | /                  | -0.98              | -0.98              | -0.93              |
| $Q_{\text{Pt}}$ (e)                    | -0.09              | -0.12             | 0.11               | /                  | -0.06              | -0.05              | -0.04              |
| $\Delta H_{\text{f}}$ (eV)             | -0.40              | -0.34             | -0.13              | /                  | -0.23              | -0.25              | -0.19              |
| $E_{\text{adh}}$ (meV/Å <sup>2</sup> ) | -78.59             | /                 | /                  | /                  | /                  | -61.11             | /                  |
| $mismatch$ (%)                         | 43.55              | /                 | /                  | /                  | /                  | 45.49              | /                  |
| $\Delta W$ (eV)                        | 2.11               | 2.11              | 2.15               | /                  | 2.16               | 2.15               | 2.14               |
| $D_z$ (eÅ)                             | -1.25              | -1.62             | -1.82              | /                  | -1.90              | -1.83              | -1.68              |
| $m_B$ ( $\mu_B$ )                      | 0.0                | 0.0               | 1.55               | /                  | 0.22               | 0.11               | 1.44               |
| MS                                     | NM                 | NM                | FM                 | /                  | AFM                | AFM                | FM                 |
| Pd substrate                           |                    |                   |                    |                    |                    |                    |                    |
| $R$ (Å)                                | -0.17              | -0.30             | -0.32              | 0.07               | -0.02              | 0.07               | 0.29               |
| $Q_{\text{Ca}}$ (e)                    | 1.53               | 1.49              | 1.49               | 1.53               | 1.50               | 1.51               | 1.51               |
| $Q_B$ (e)                              | 1.98               | 1.70              | 1.72               | 1.54               | 1.36               | 1.25               | 1.01               |
| $Q_{\text{O}}$ (e)                     | -1.13              | -0.97             | -0.99              | -1.06              | -1.00              | -1.02              | -0.95              |
| $Q_{\text{Pd}}$ (e)                    | -0.07              | -0.09             | -0.08              | -0.02              | -0.04              | -0.03              | -0.02              |
| $\Delta H_{\text{f}}$ (eV)             | -0.40              | -0.34             | -0.14              | -0.24              | -0.23              | -0.24              | -0.20              |
| $E_{\text{adh}}$ (meV/Å <sup>2</sup> ) | -81.14             | /                 | /                  | /                  | /                  | -64.81             | /                  |
| $mismatch$ (%)                         | 42.51              | /                 | /                  | /                  | /                  | 44.49              | /                  |
| $\Delta W$ (eV)                        | 2.10               | 2.11              | 2.12               | 2.16               | 2.12               | 2.13               | 2.12               |
| $D_z$ (eÅ)                             | -1.00              | -1.13             | -1.06              | -0.89              | -1.26              | -1.37              | -1.35              |
| $m_B$ ( $\mu_B$ )                      | 0.00               | 0.00              | 1.14               | 0.00               | 0.26               | 0.12               | 1.45               |
| MS                                     | NM                 | NM                | FM                 | FM                 | AFM                | AFM                | AFM                |
| Au substrate                           |                    |                   |                    |                    |                    |                    |                    |
| $R$ (Å)                                | -0.16              | -0.40             | -0.36              | 0.06               | 0.04               | 0.14               | 0.23               |
| $Q_{\text{Ca}}$ (e)                    | 1.55               | 1.54              | 1.53               | 1.55               | 1.54               | 1.54               | 1.53               |
| $Q_B$ (e)                              | 2.03               | 1.75              | 1.80               | 1.59               | 1.38               | 1.15               | 1.02               |
| $Q_{\text{O}}$ (e)                     | -1.16              | -0.96             | -1.02              | -1.07              | -1.05              | -1.06              | -1.00              |
| $Q_{\text{Au}}$ (e)                    | -0.08              | -0.11             | -0.09              | -0.04              | -0.03              | 0.00               | 0.00               |
| $\Delta H_{\text{f}}$ (eV)             | -0.40              | -0.34             | -0.12              | -0.25              | -0.23              | -0.23              | -0.18              |
| $E_{\text{adh}}$ (meV/Å <sup>2</sup> ) | -68.16             | /                 | /                  | -61.77             | /                  | -41.80             | /                  |
| $mismatch$ (%)                         | 48.56              | /                 | /                  | 47.51              | /                  | 50.33              | /                  |
| $\Delta W$ (eV)                        | 2.07               | 2.07              | 2.07               | 2.11               | 2.08               | 2.11               | 2.14               |
| $D_z$ (eÅ)                             | -0.93              | -1.03             | -0.92              | -0.73              | -1.11              | -1.39              | -1.68              |
| $m_B$ ( $\mu_B$ )                      | 0.00               | 0.00              | 0.65               | 0.00               | 0.17               | 1.33               | 1.24               |
| MS                                     | NM                 | NM                | AFM                | AFM                | AFM                | AFM                | FM                 |

## Gibbs free energies

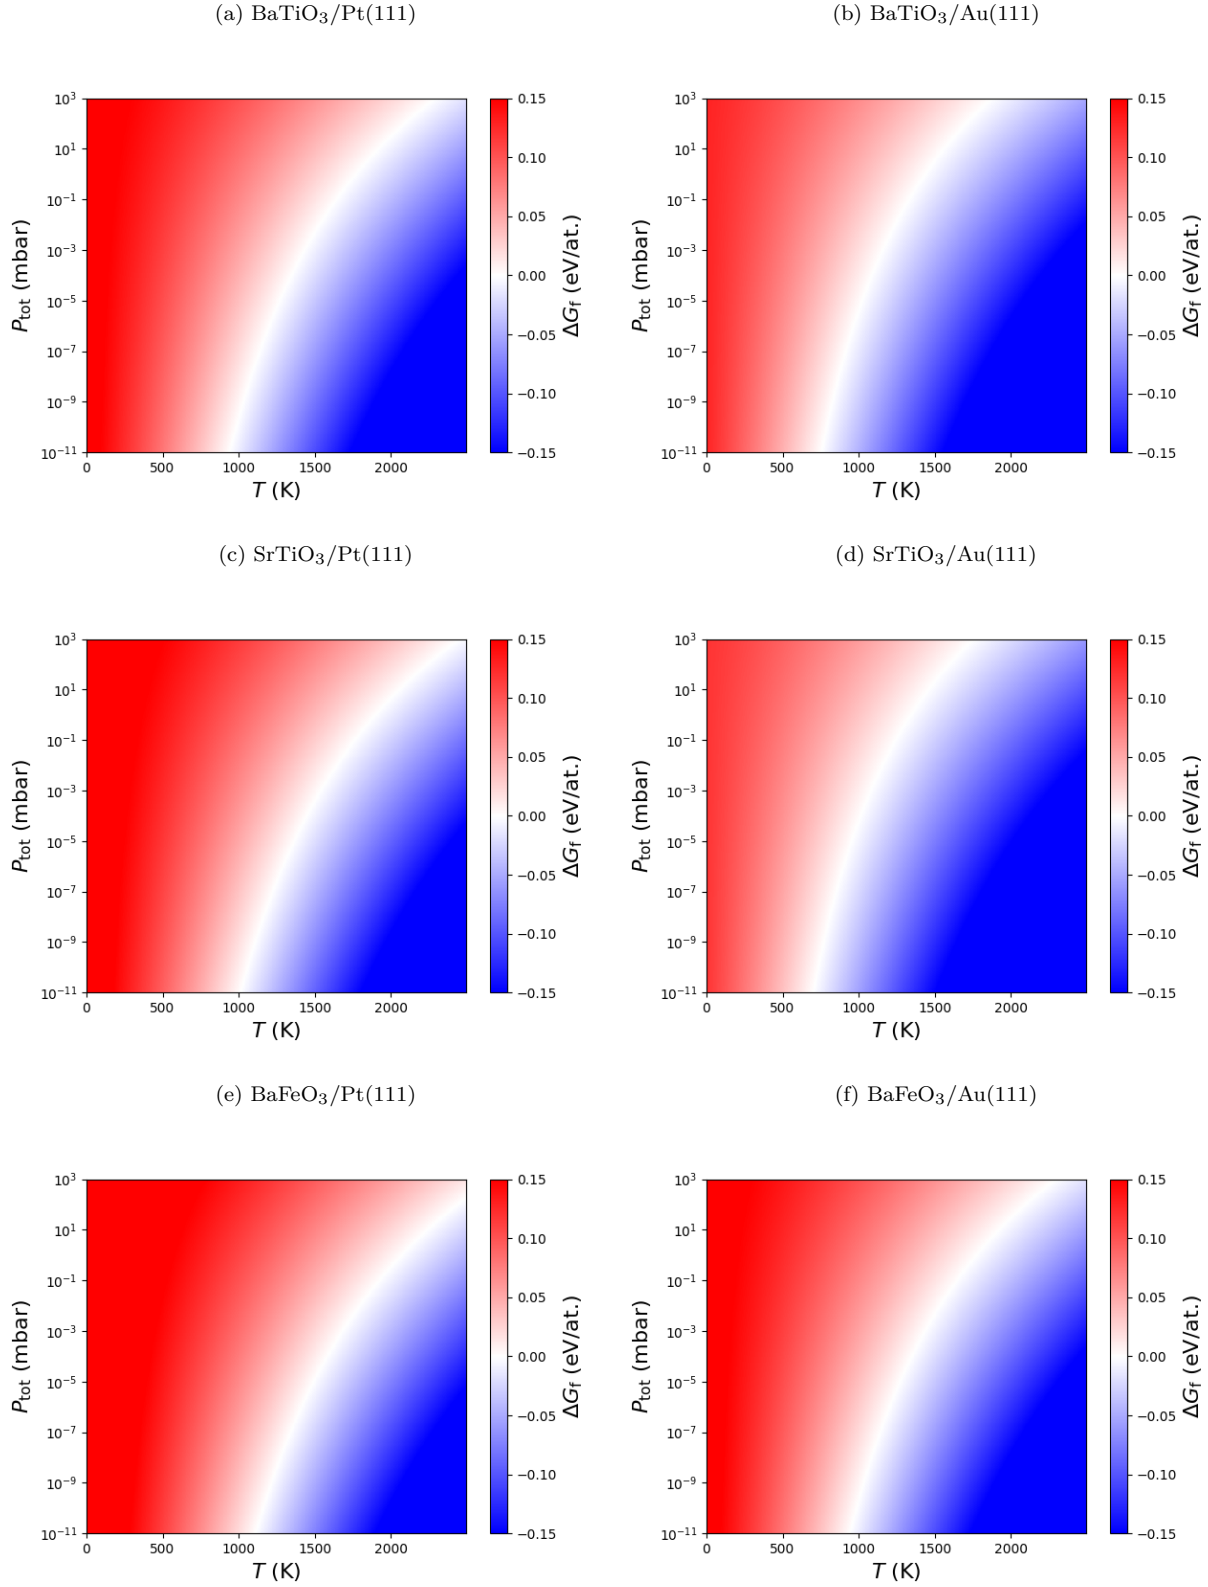

Figure S4: Gibbs free energy of the following reaction :  $15 \text{ Pt}_{32}\text{Ba}_8\text{B}_6\text{O}_{24} \rightarrow 4 \text{ Pt}_{120}\text{Ba}_5\text{B}_4\text{O}_{12} + 74 \text{ BaBO}_3 + 45 \text{ O}_2 + 26 \text{ Ba}$ . The thick  $\text{ABO}_3$  film is more stable than the OQA in the red region. The OQA is more stable than the thick  $\text{ABO}_3$  film in the blue region.

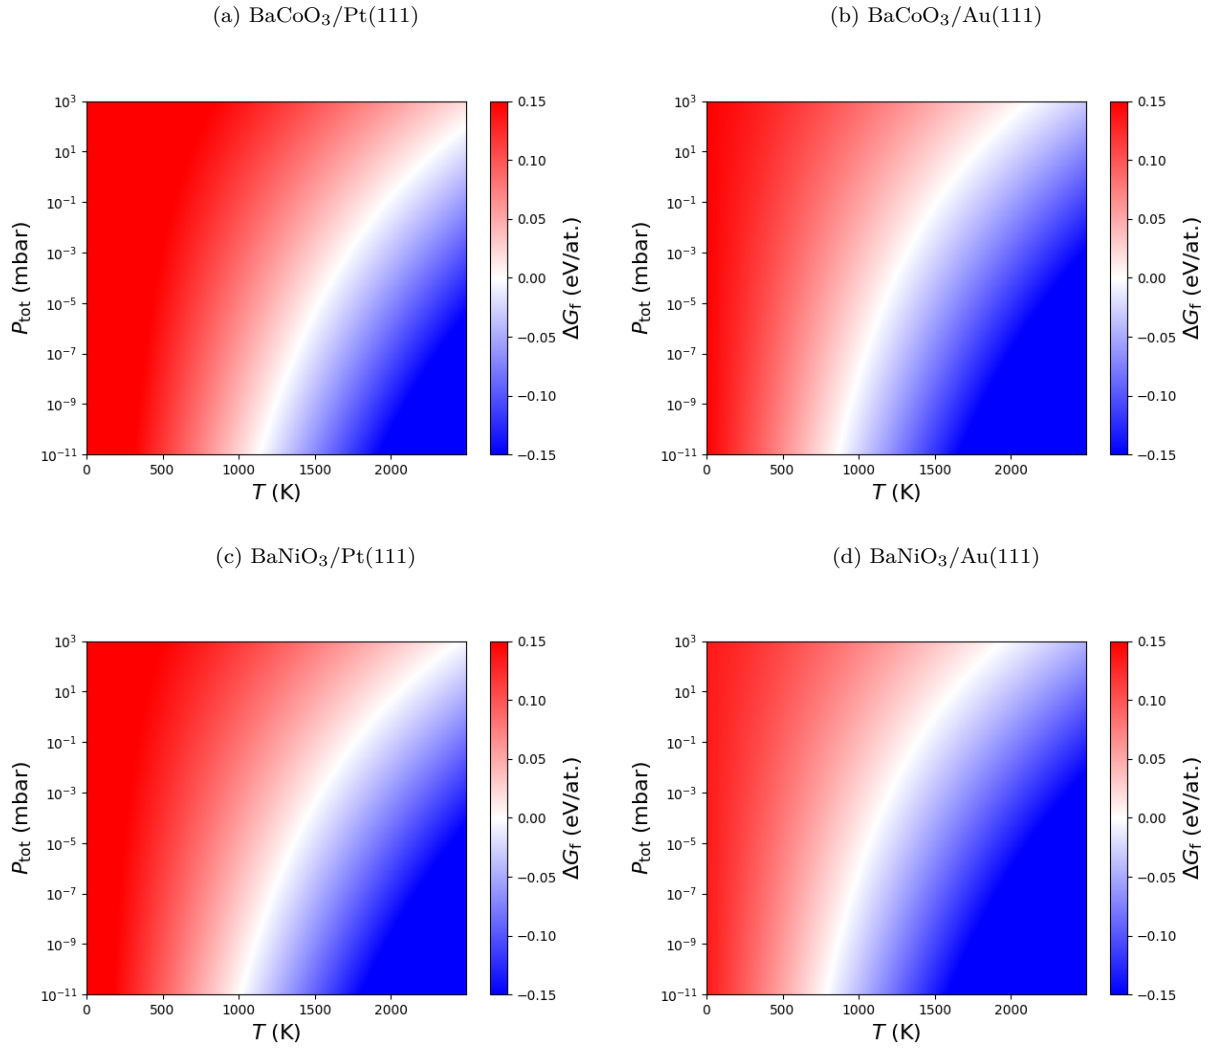

Figure S5: Gibbs free energy of the following reaction :  $15 \text{ Pt}_{32}\text{Ba}_8\text{B}_6\text{O}_{24} \rightarrow 4 \text{ Pt}_{120}\text{Ba}_5\text{B}_4\text{O}_{12} + 74 \text{ BaBO}_3 + 45 \text{ O}_2 + 26 \text{ Ba}$ . The thick  $\text{ABO}_3$  film is more stable than the OQA in the red region. The OQA is more stable than the thick  $\text{ABO}_3$  film in the blue region.

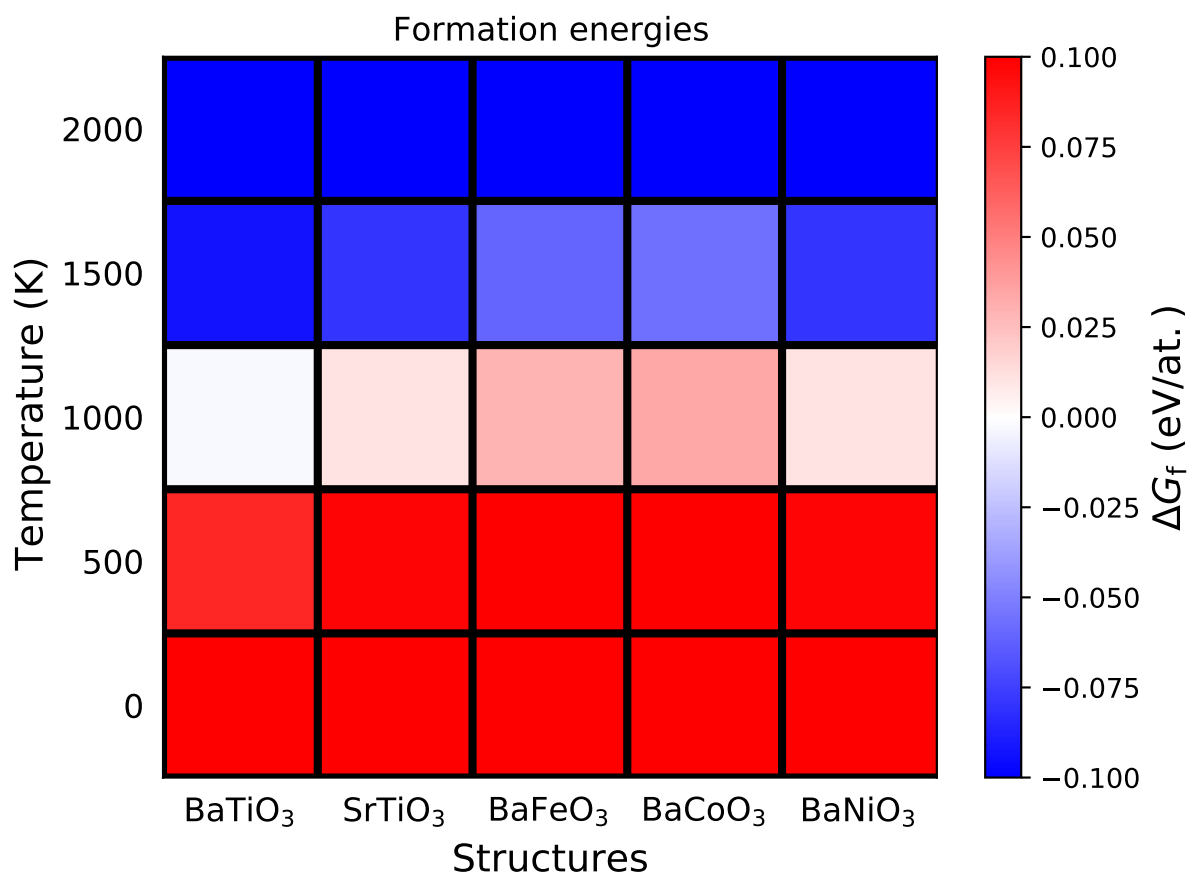

Figure S6: Gibbs free energy corresponding to the following reaction :  $15 \text{ Pt}_{32}\text{Ba}_8\text{B}_6\text{O}_{24} \rightarrow 4 \text{ Pt}_{120}\text{Ba}_5\text{B}_4\text{O}_{12} + 74 \text{ BaBO}_3 + 45 \text{ O}_2 + 26 \text{ Ba}$  ( $P = 10^{-10}$  mbar).



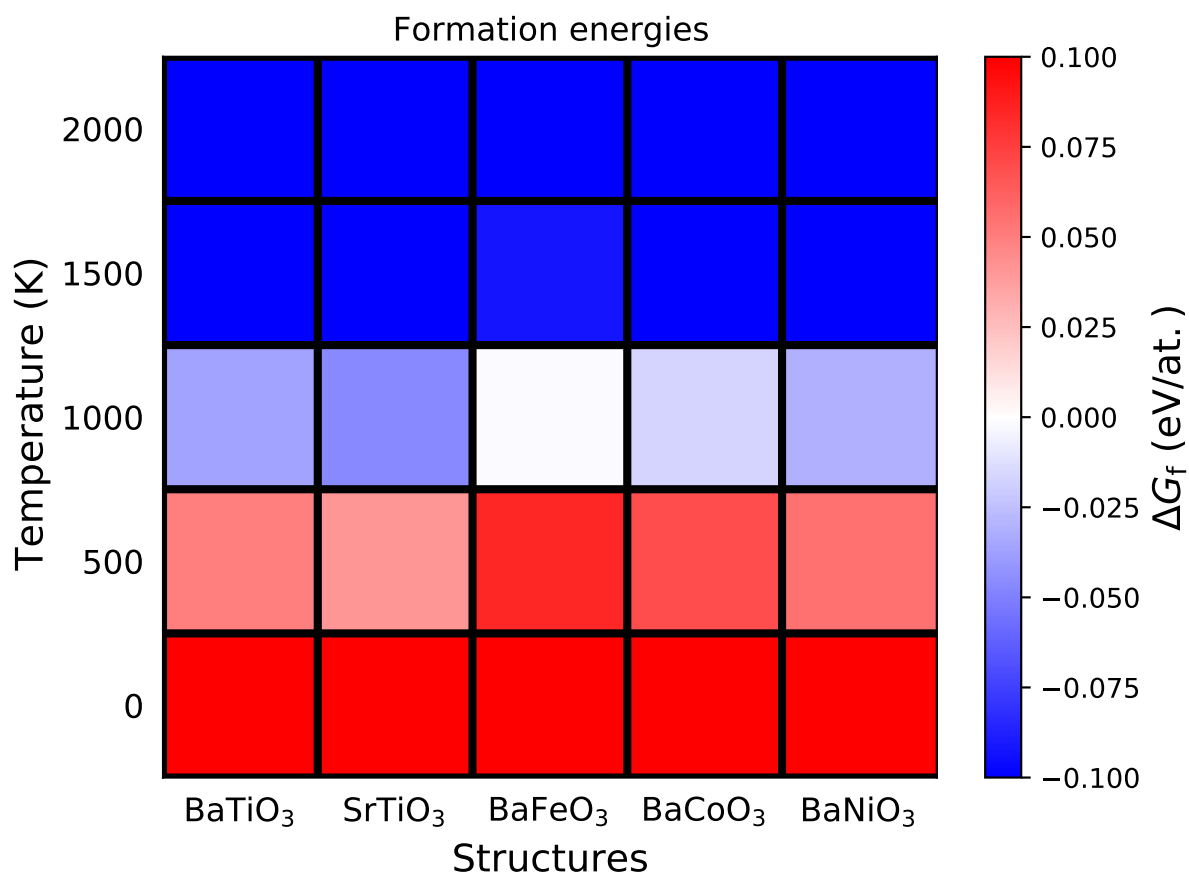

Figure S7: Gibbs free energy corresponding to the following reaction :  $15 \text{ Au}_{32}\text{Ba}_8\text{B}_6\text{O}_{24} \rightarrow 4 \text{ Au}_{120}\text{Ba}_5\text{B}_4\text{O}_{12} + 74 \text{ BaBO}_3 + 45 \text{ O}_2 + 26 \text{ Ba}$  ( $P = 10^{-10}$  mbar).

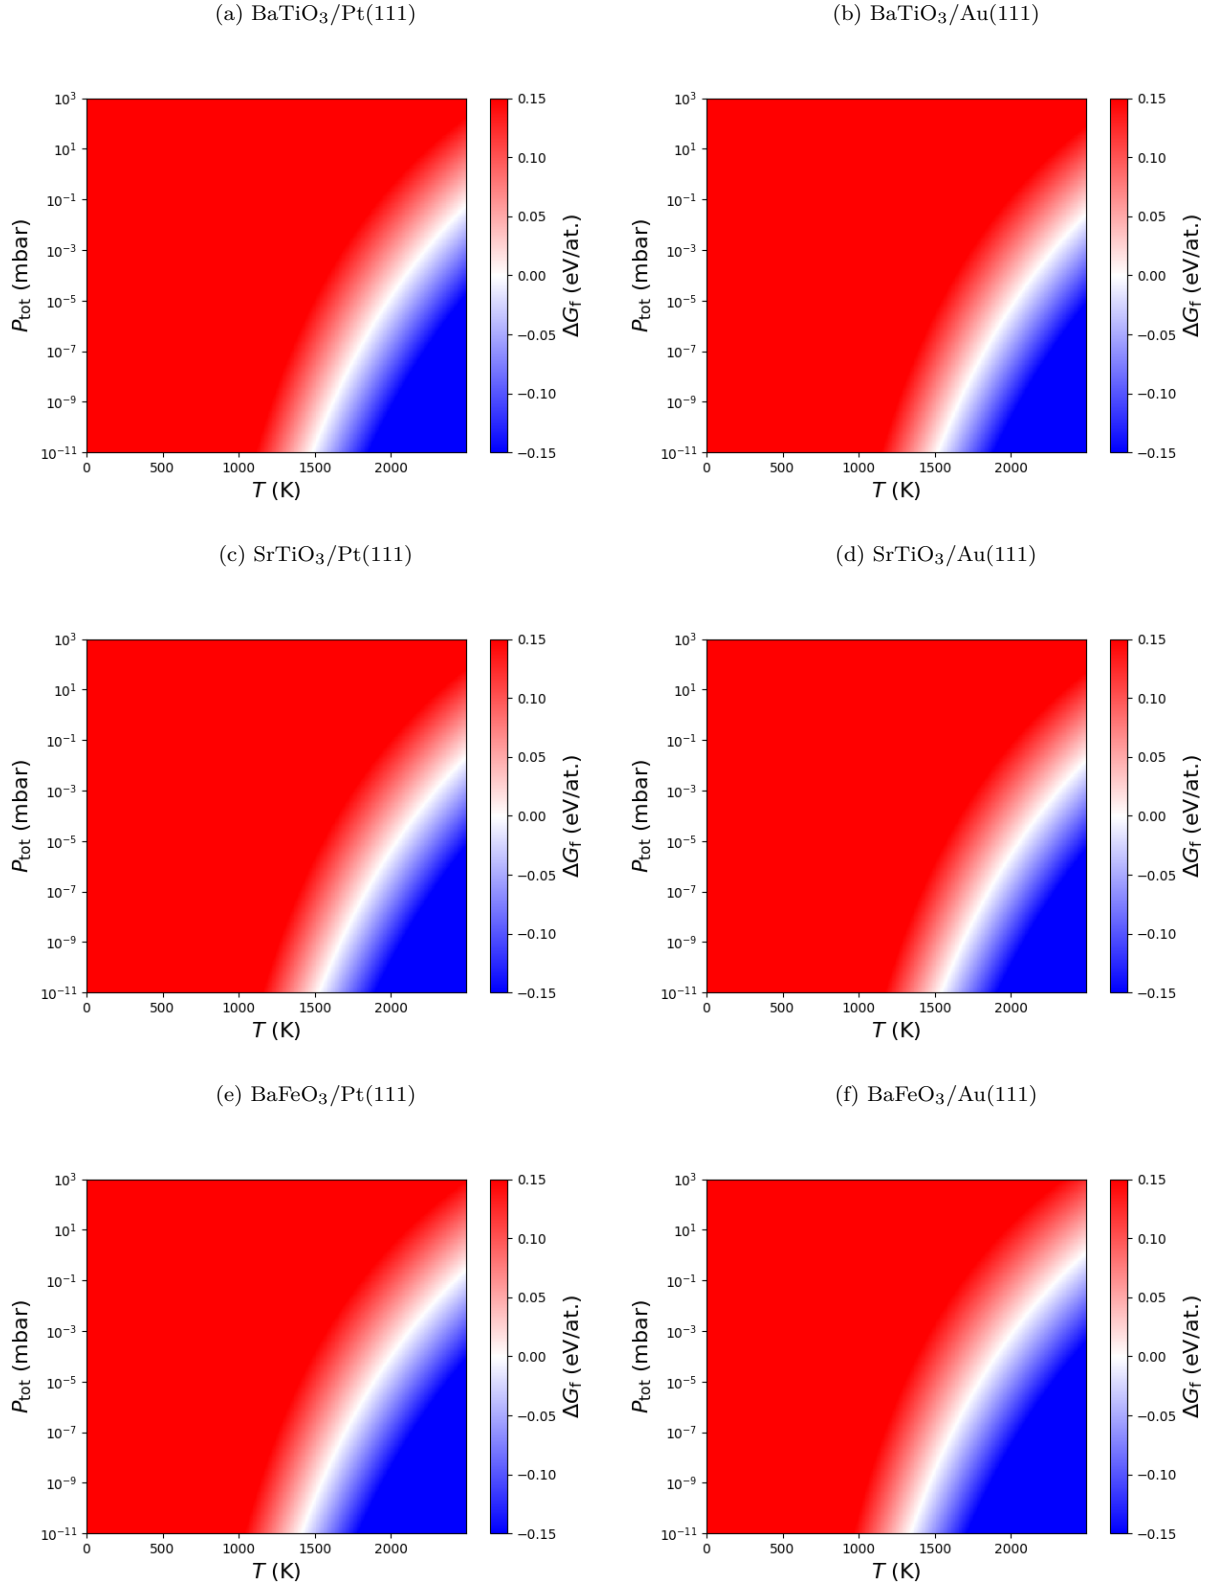

Figure S8: Gibbs free energy of the following reaction :  $\text{Pt}_{32}\text{Ba}_8\text{B}_6\text{O}_{24} \rightarrow \text{Pt}_{32}\text{BaB}_4\text{O}_6 + 2 \text{BaBO}_3 + 6 \text{O}_2 + 5/2 \text{Ba}$ . The thick  $\text{ABO}_3$  film is more stable than the SHS in the red region. The SHS is more stable than the thick  $\text{ABO}_3$  film in the blue region.

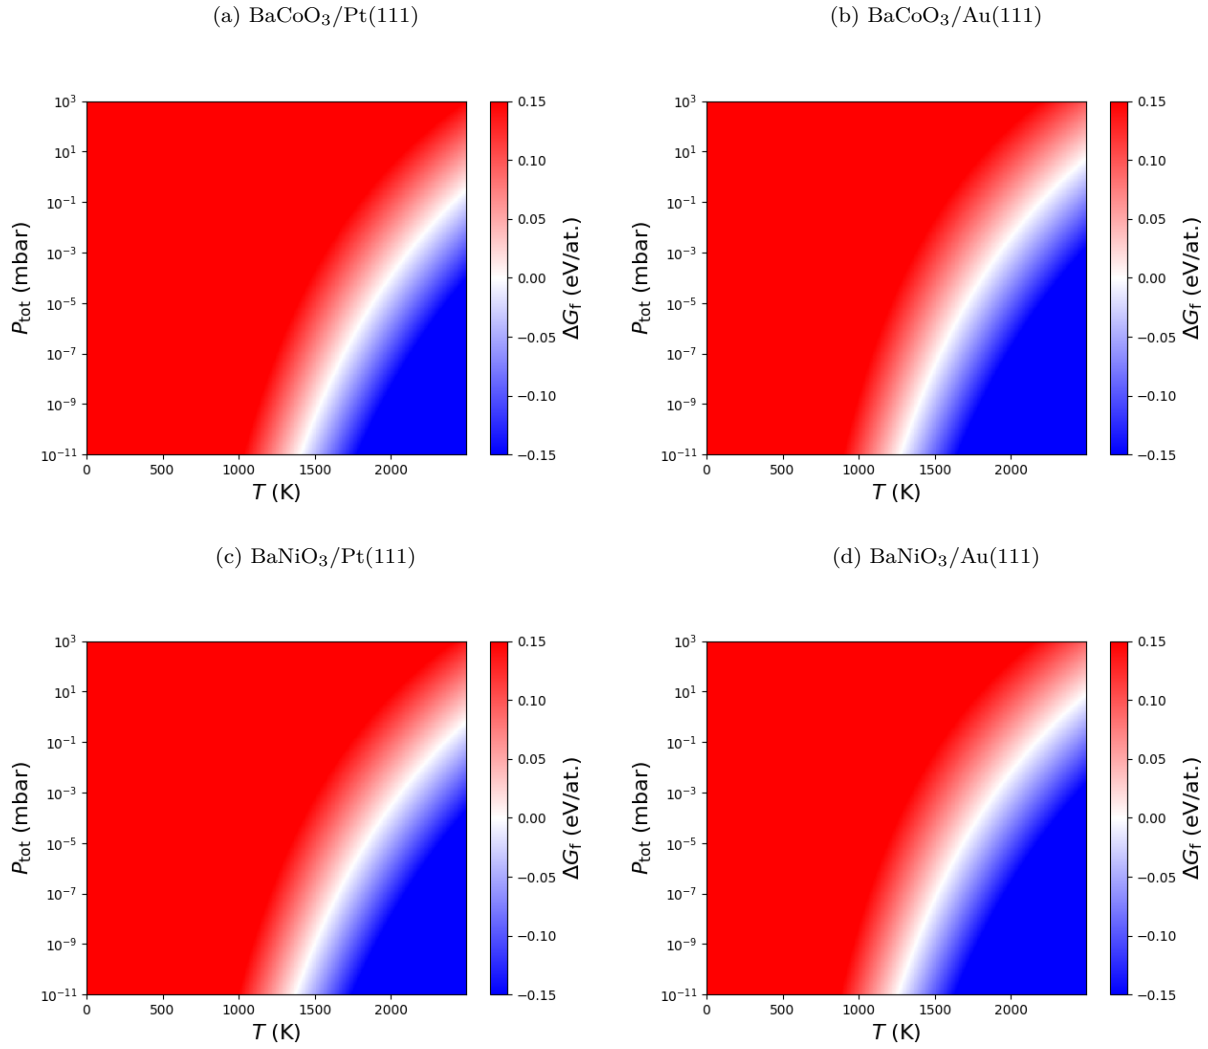

Figure S9: Gibbs free energy of the following reaction :  $\text{Pt}_{32}\text{Ba}_8\text{B}_6\text{O}_{24} \rightarrow \text{Pt}_{32}\text{BaB}_4\text{O}_6 + 2 \text{BaBO}_3 + 6 \text{O}_2 + 5/2 \text{Ba}$ . The thick  $\text{ABO}_3$  film is more stable than the SHS in the red region. The SHS is more stable than the thick  $\text{ABO}_3$  film in the blue region.

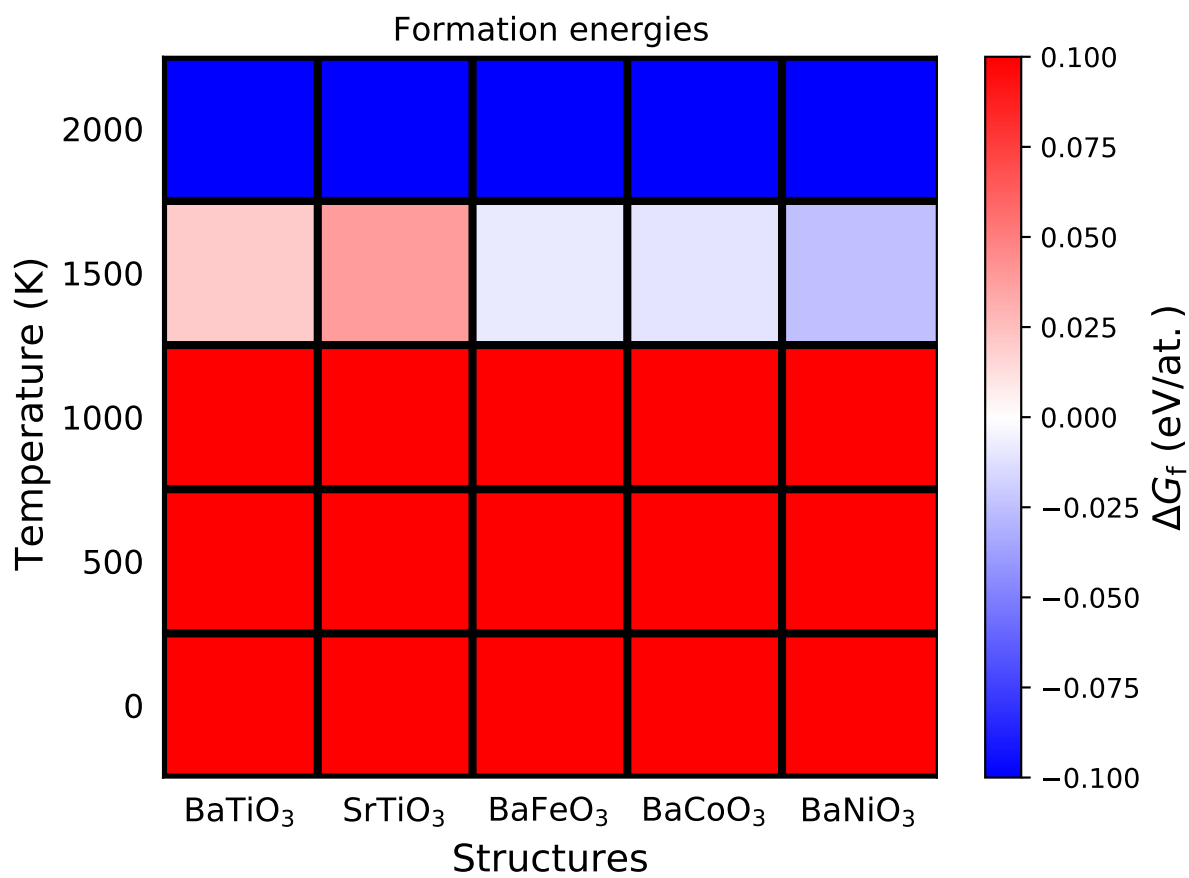

Figure S10: Gibbs free energy corresponding to the following reaction :  $\text{Pt}_{32}\text{Ba}_8\text{B}_6\text{O}_{24} \rightarrow \text{Pt}_{32}\text{Ba}_4\text{B}_4\text{O}_6 + 2 \text{BaBO}_3 + 6 \text{O}_2 + 5/2 \text{Ba}$  ( $P = 10^{-10}$  mbar).

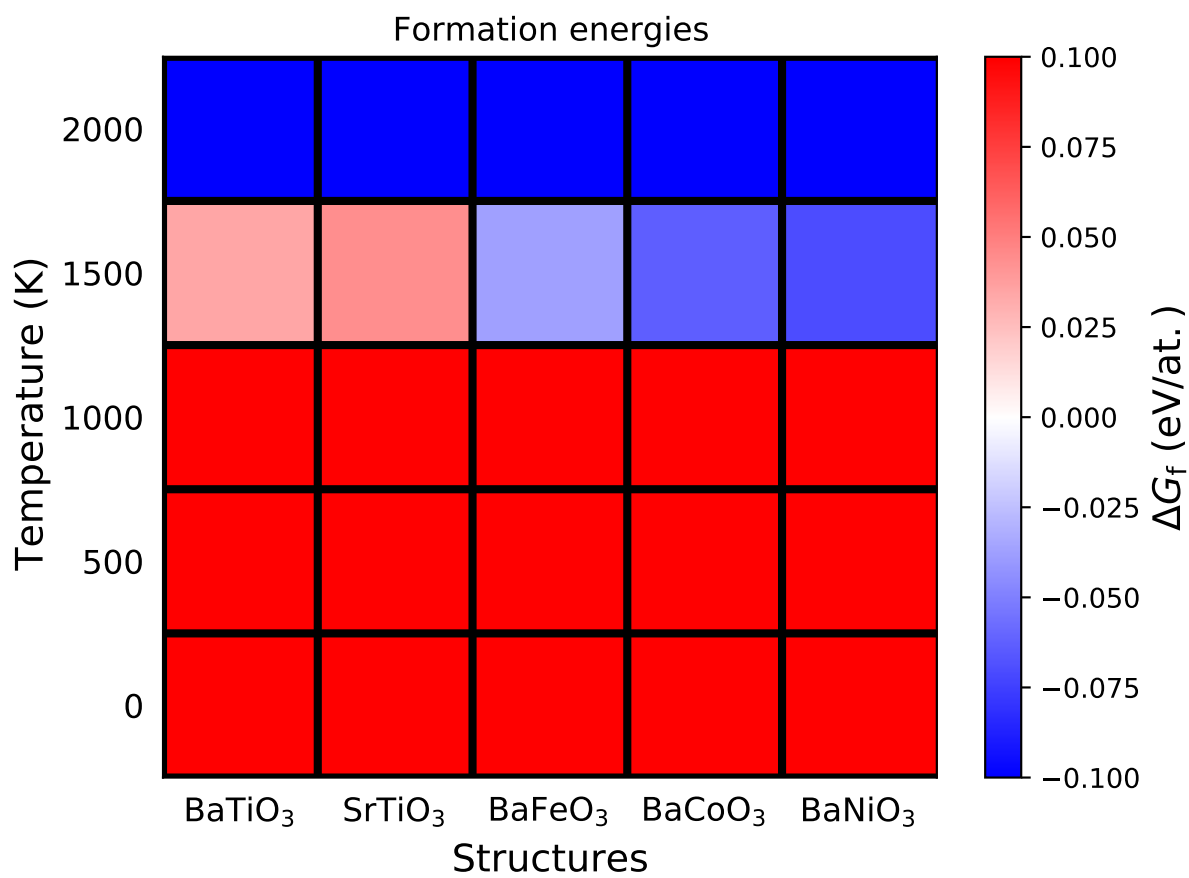

Figure S11: Gibbs free energy corresponding to the following reaction :  $\text{Au}_{32}\text{Ba}_8\text{B}_6\text{O}_{24} \rightarrow \text{Au}_{32}\text{Ba}_4\text{B}_4\text{O}_6 + 2 \text{BaBO}_3 + 6 \text{O}_2 + 5/2 \text{Ba}$  ( $P = 10^{-10}$  mbar).

## Atomic structures of OQAs

Table S8: Average  $A-O$ ,  $B-O$ ,  $A-Me$ , and  $B-Me$  bond lengths, as well as the rumplings and average  $O-B-O$  angles in all structures.

|                    | BaTiO <sub>3</sub> | BaVO <sub>3</sub> | BaCrO <sub>3</sub> | BaMnO <sub>3</sub> | BaFeO <sub>3</sub> | BaCoO <sub>3</sub> | BaNiO <sub>3</sub> |
|--------------------|--------------------|-------------------|--------------------|--------------------|--------------------|--------------------|--------------------|
| Freestanding layer |                    |                   |                    |                    |                    |                    |                    |
| $B-O$ (Å)          | 1.79               | 1.74              | /                  | /                  | 1.71               | 1.73               | 1.72               |
| Ba-O (Å)           | 2.64               | 2.64              | /                  | /                  | 2.7                | 2.55               | 2.63               |
| $O-B-O$ angle (°)  | 120.0              | 120.0             | /                  | /                  | 120.0              | 120.0              | 120.0              |
| Pt substrate       |                    |                   |                    |                    |                    |                    |                    |
| $B-O$ (Å)          | 1.84               | 1.74              | 1.72               | /                  | 1.81               | 1.84               | 1.88               |
| Ba-O (Å)           | 2.7                | 2.78              | 2.78               | /                  | 2.66               | 2.67               | 2.7                |
| $B-Pt$ (Å)         | 3.06               | 2.82              | 2.9                | /                  | 2.91               | 2.98               | 2.88               |
| Ba-Pt (Å)          | 3.48               | 3.43              | 3.52               | /                  | 3.52               | 3.52               | 3.55               |
| $O-B-O$ angle (°)  | 112.2              | 111.0             | 113.4              | /                  | 115.4              | 117.3              | 117.5              |
| Pd substrate       |                    |                   |                    |                    |                    |                    |                    |
| $B-O$ (Å)          | 1.83               | 1.74              | 1.71               | 1.77               | 1.79               | 1.82               | 1.87               |
| $B-Pd$ (Å)         | 3.02               | 2.95              | 2.91               | 3.02               | 2.92               | 2.99               | 2.87               |
| Ba-O (Å)           | 2.67               | 2.75              | 2.74               | 2.68               | 2.65               | 2.63               | 2.74               |
| Ba-Pd (Å)          | 3.51               | 3.5               | 3.49               | 3.48               | 3.57               | 3.59               | 3.55               |
| $O-B-O$ angle (°)  | 113.8              | 111.4             | 114.3              | 117.3              | 116.9              | 118.8              | 118.1              |
| Au substrate       |                    |                   |                    |                    |                    |                    |                    |
| $B-O$ (Å)          | 1.82               | 1.72              | /                  | 1.79               | 1.77               | 1.79               | 1.86               |
| $B-Au$ (Å)         | 3.09               | 2.99              | /                  | 3.03               | 2.93               | 2.93               | 2.94               |
| Ba-O (Å)           | 2.74               | 2.76              | /                  | 2.72               | 2.7                | 2.7                | 2.71               |
| Ba-Au (Å)          | 3.54               | 3.42              | /                  | 3.55               | 3.54               | 3.55               | 3.56               |
| $O-B-O$ angle (°)  | 115.3              | 112.2             | /                  | 118.8              | 118.5              | 119.7              | 118.9              |
|                    | SrTiO <sub>3</sub> | SrVO <sub>3</sub> | SrCrO <sub>3</sub> | SrMnO <sub>3</sub> | SrFeO <sub>3</sub> | SrCoO <sub>3</sub> | SrNiO <sub>3</sub> |
| Freestanding layer |                    |                   |                    |                    |                    |                    |                    |
| $B-O$ (Å)          | 1.79               | 1.74              | 1.82               | 1.76               | /                  | /                  | 1.72               |
| Sr-O (Å)           | 2.46               | 2.58              | 2.43               | 2.5                | /                  | /                  | 2.53               |
| $O-B-O$ angle (°)  | 120.0              | 120.0             | 120.0              | 120.0              | /                  | /                  | 120.0              |
| Pt substrate       |                    |                   |                    |                    |                    |                    |                    |
| $B-O$ (Å)          | 1.85               | 1.75              | 1.73               | 1.86               | 1.82               | 1.85               | 1.84               |
| $B-Pt$ (Å)         | 3.06               | 2.98              | 2.91               | 3.02               | 2.91               | 2.97               | 2.95               |
| Sr-O (Å)           | 2.55               | 2.69              | 2.67               | 2.5                | 2.54               | 2.53               | 2.49               |
| Sr-Pt (Å)          | 3.34               | 3.27              | 3.27               | 3.34               | 3.31               | 3.34               | 3.33               |
| $O-B-O$ angle (°)  | 113.6              | 111.6             | 114.4              | 118.0              | 116.2              | 117.8              | 118.2              |
| Pd substrate       |                    |                   |                    |                    |                    |                    |                    |
| $B-O$ (Å)          | 1.84               | 1.74              | 1.77               | 1.82               | 1.8                | 1.82               | 1.8                |
| $B-Pd$ (Å)         | 3.04               | 3.01              | 2.97               | 3.0                | 2.92               | 2.89               | 2.98               |
| Sr-O (Å)           | 2.51               | 2.64              | 2.7                | 2.47               | 2.5                | 2.48               | 2.49               |
| Sr-Pd (Å)          | 3.31               | 3.31              | 3.42               | 3.29               | 3.27               | 3.3                | 3.3                |
| $O-B-O$ angle (°)  | 114.3              | 112.5             | 114.5              | 118.7              | 117.6              | 119.0              | 118.9              |
| Au substrate       |                    |                   |                    |                    |                    |                    |                    |
| $B-O$ (Å)          | 1.83               | 1.72              | /                  | 1.86               | 1.79               | 1.85               | 1.86               |
| $B-Au$ (Å)         | 3.12               | 3.01              | /                  | 3.07               | 2.93               | 2.86               | 2.97               |
| Sr-O (Å)           | 2.54               | 2.58              | /                  | 2.48               | 2.56               | 2.51               | 2.45               |
| Sr-Au (Å)          | 3.29               | 3.23              | /                  | 3.4                | 3.29               | 3.32               | 3.36               |
| $O-B-O$ angle (°)  | 116.0              | 113.6             | /                  | 119.5              | 119.1              | 119.7              | 119.0              |
|                    | CaTiO <sub>3</sub> | CaVO <sub>3</sub> | CaCrO <sub>3</sub> | CaMnO <sub>3</sub> | CaFeO <sub>3</sub> | CaCoO <sub>3</sub> | CaNiO <sub>3</sub> |
| Freestanding layer |                    |                   |                    |                    |                    |                    |                    |
| $B-O$ (Å)          | 1.8                | /                 | /                  | 1.77               | /                  | 1.72               | /                  |
| Ca-O (Å)           | 2.14               | /                 | /                  | 2.26               | /                  | 2.26               | /                  |
| $O-B-O$ angle (°)  | 120.0              | /                 | /                  | 120.0              | /                  | 120.0              | /                  |
| Pt substrate       |                    |                   |                    |                    |                    |                    |                    |
| $R$ (Å)            | -0.24              | -0.35             | -0.31              | /                  | -0.17              | -0.10              | -0.07              |
| $B-O$ (Å)          | 1.86               | 1.75              | 1.73               | /                  | 1.85               | 1.88               | 1.91               |
| $B-Pt$ (Å)         | 3.07               | 2.96              | 2.9                | /                  | 2.91               | 2.95               | 2.95               |
| Ca-O (Å)           | 2.43               | 2.5               | 2.46               | /                  | 2.42               | 2.39               | 2.35               |
| Ca-Pt (Å)          | 3.17               | 3.13              | 3.1                | /                  | 3.17               | 3.18               | 3.19               |
| $O-B-O$ angle (°)  | 115.3              | 112.5             | 114.9              | /                  | 117.1              | 118.3              | 119.0              |
| Pd substrate       |                    |                   |                    |                    |                    |                    |                    |
| $R$ (Å)            | -0.22              | -0.33             | -0.30              | -0.11              | -0.13              | -0.06              | 0.00               |
| $B-O$ (Å)          | 1.84               | 1.75              | 1.73               | 1.85               | 1.82               | 1.85               | 1.78               |
| $B-Pd$ (Å)         | 3.05               | 3.01              | 2.92               | 3.01               | 2.95               | 2.94               | 2.81               |
| Ca-O (Å)           | 2.38               | 2.5               | 2.56               | 2.34               | 2.35               | 2.34               | 2.29               |
| Ca-Pd (Å)          | 3.2                | 3.12              | 3.08               | 3.2                | 3.16               | 3.13               | 3.14               |
| $O-B-O$ angle (°)  | 116.0              | 113.9             | 116.2              | 119.2              | 118.4              | 119.0              | 128.4              |
| Au substrate       |                    |                   |                    |                    |                    |                    |                    |
| $R$ (Å)            | -0.13              | -0.36             | -0.26              | -0.12              | 0.01               | 0.13               | 0.14               |
| $B-O$ (Å)          | 1.84               | 1.73              | 1.73               | 1.94               | 1.86               | 1.92               | 1.89               |
| $B-Au$ (Å)         | 3.13               | 3.06              | 3.04               | 2.98               | 2.95               | 2.85               | 2.92               |
| Ca-O (Å)           | 2.33               | 2.32              | 2.37               | 2.46               | 2.39               | 2.33               | 2.3                |
| Ca-Au (Å)          | 3.23               | 3.05              | 3.08               | 3.18               | 3.2                | 3.2                | 3.24               |
| $O-B-O$ angle (°)  | 116.8              | 114.0             | 117.0              | 119.3              | 119.5              | 119.5              | 122.4              |

## Size mismatch and rumpling for OQAs

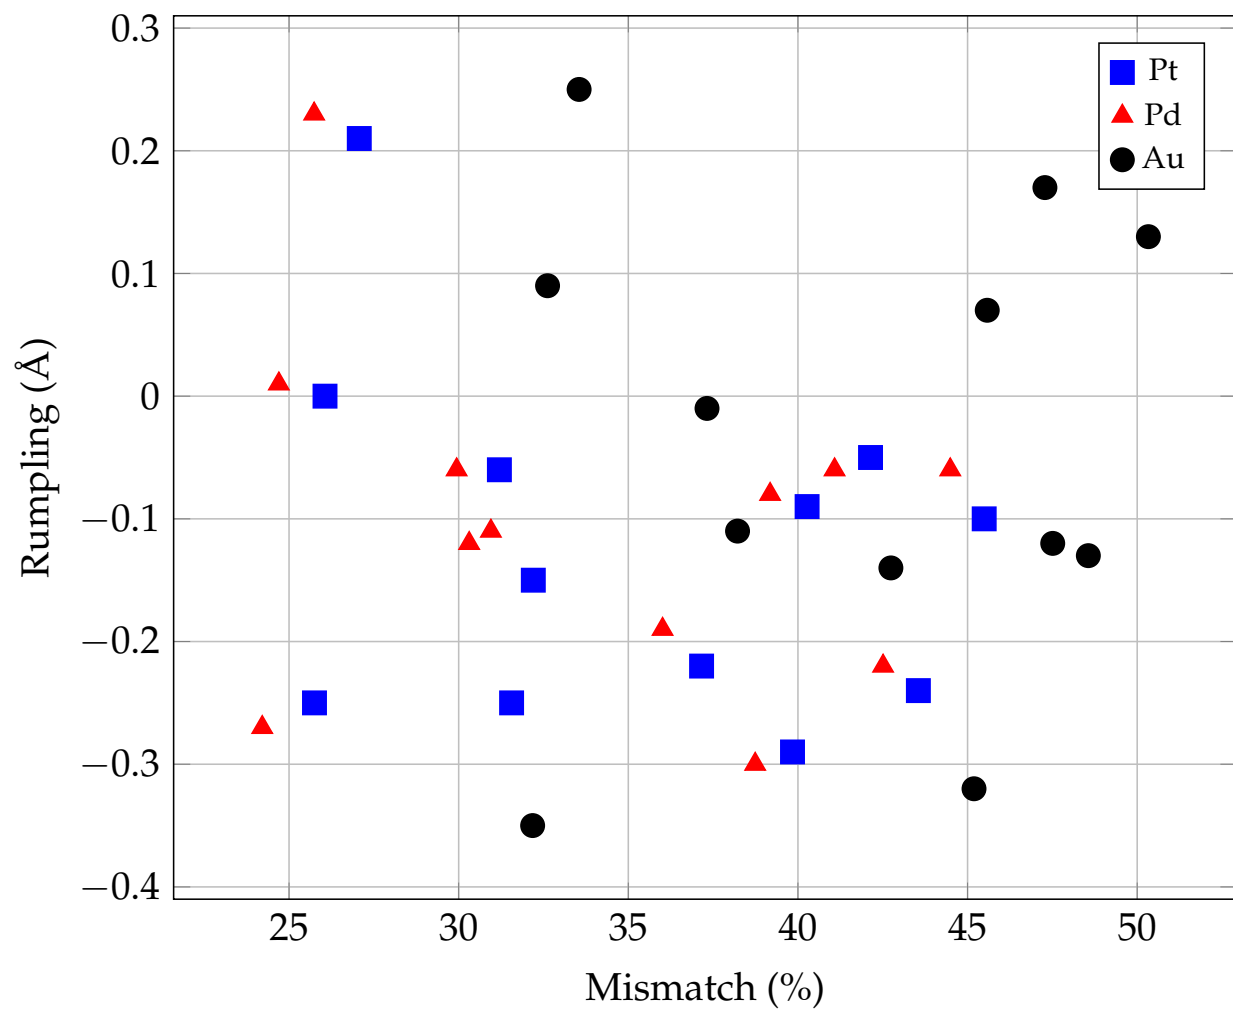

Figure S12: Plot of the rumpling as a function of the size mismatch for selected structures.



## Averaged planar differences

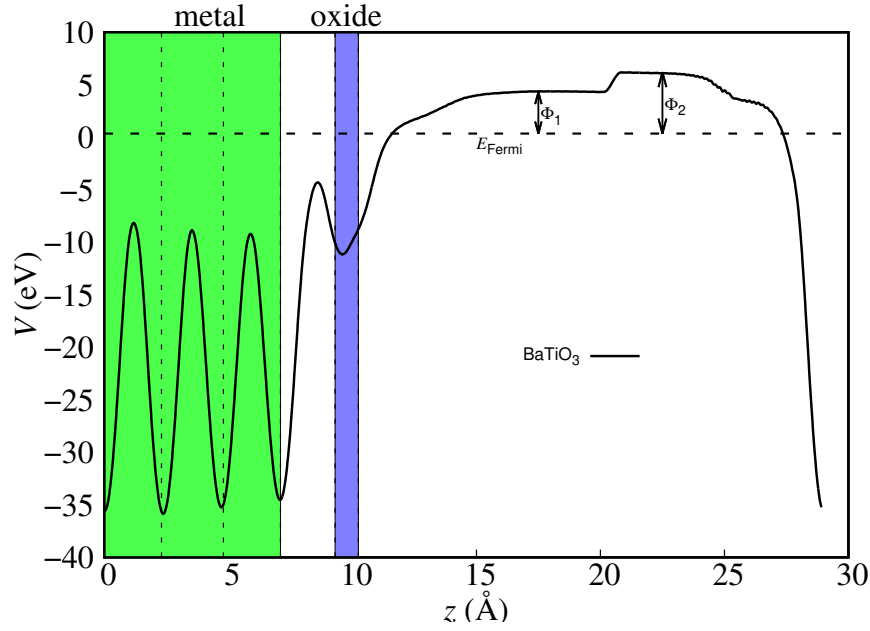

Figure S13: Planar averaged electrostatic potential ( $\bar{V}(z) = \frac{1}{A} \int_A V(x, y, z) dx dy$ , where  $A$  is the surface area) for BaTiO<sub>3</sub> on Pt. Green band represents the Pt(111) slab and blue stripe indicates the position of the OQA layer.  $\Phi_1$  and  $\Phi_2$  are the values in the plateau of the average electrostatic potential in the vacuum level (with the Fermi energy as a reference in zero) for the metal-oxide and metal systems, respectively.

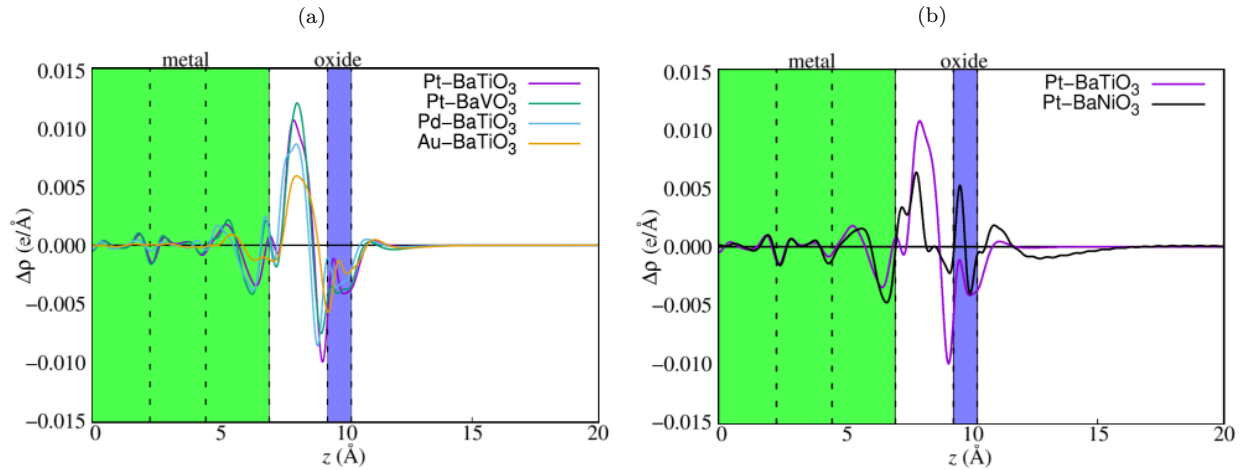

Figure S14: Planar averaged electron charge density differences ( $\Delta\rho(z) = \int_A \Delta\rho(x, y, z) dx dy$ , where integration was performed over the area ( $A$ ) spanned by the surface supercell) for several OQA structures studied in this work. Green represents the Pt(111) slab and blue stripe indicates the position of the OQA layer.

# Adhesion energies as a function of size mismatch, rumpling and charge transfer

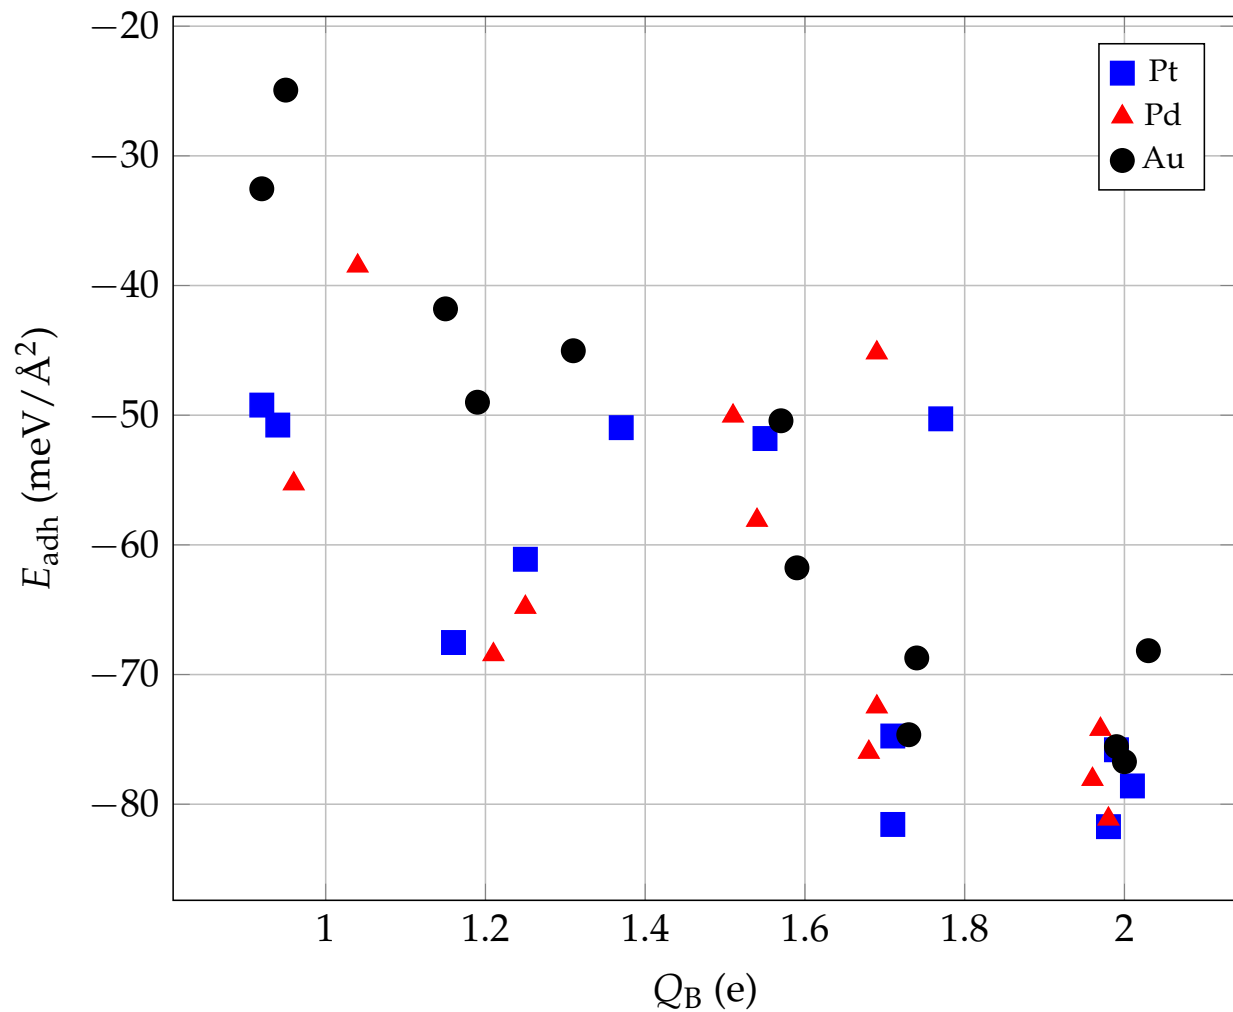

Figure S15: Plot of the adhesion energy ( $E_{\text{adh}}$ ) as a function of the Bader charge of  $B$  atom ( $Q_B$ ).

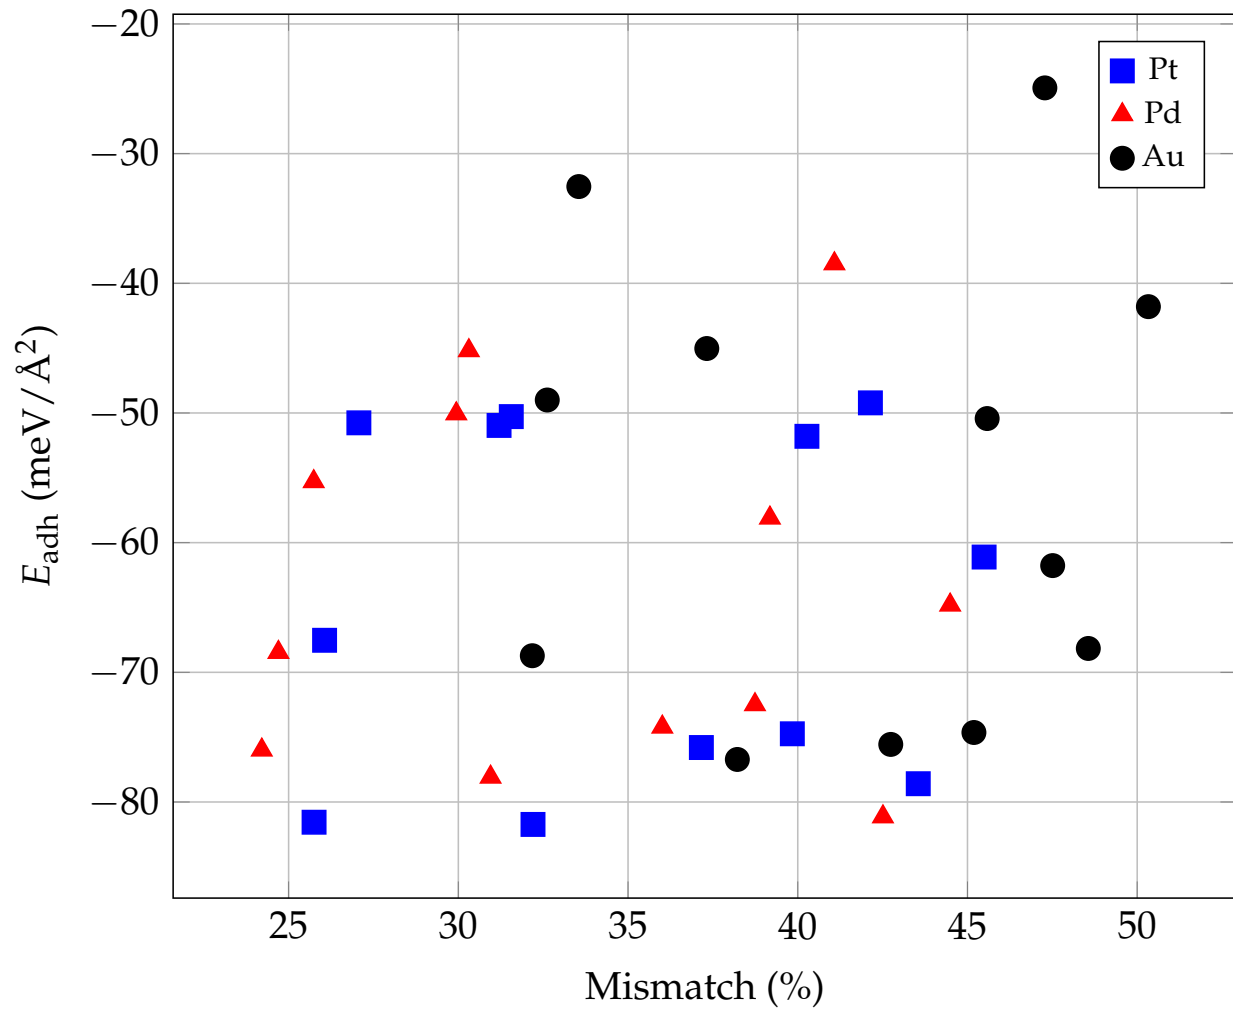

Figure S16: Plot of the adhesion energy ( $E_{\text{adh}}$ ) as a function of the size mismatch for selected structures.

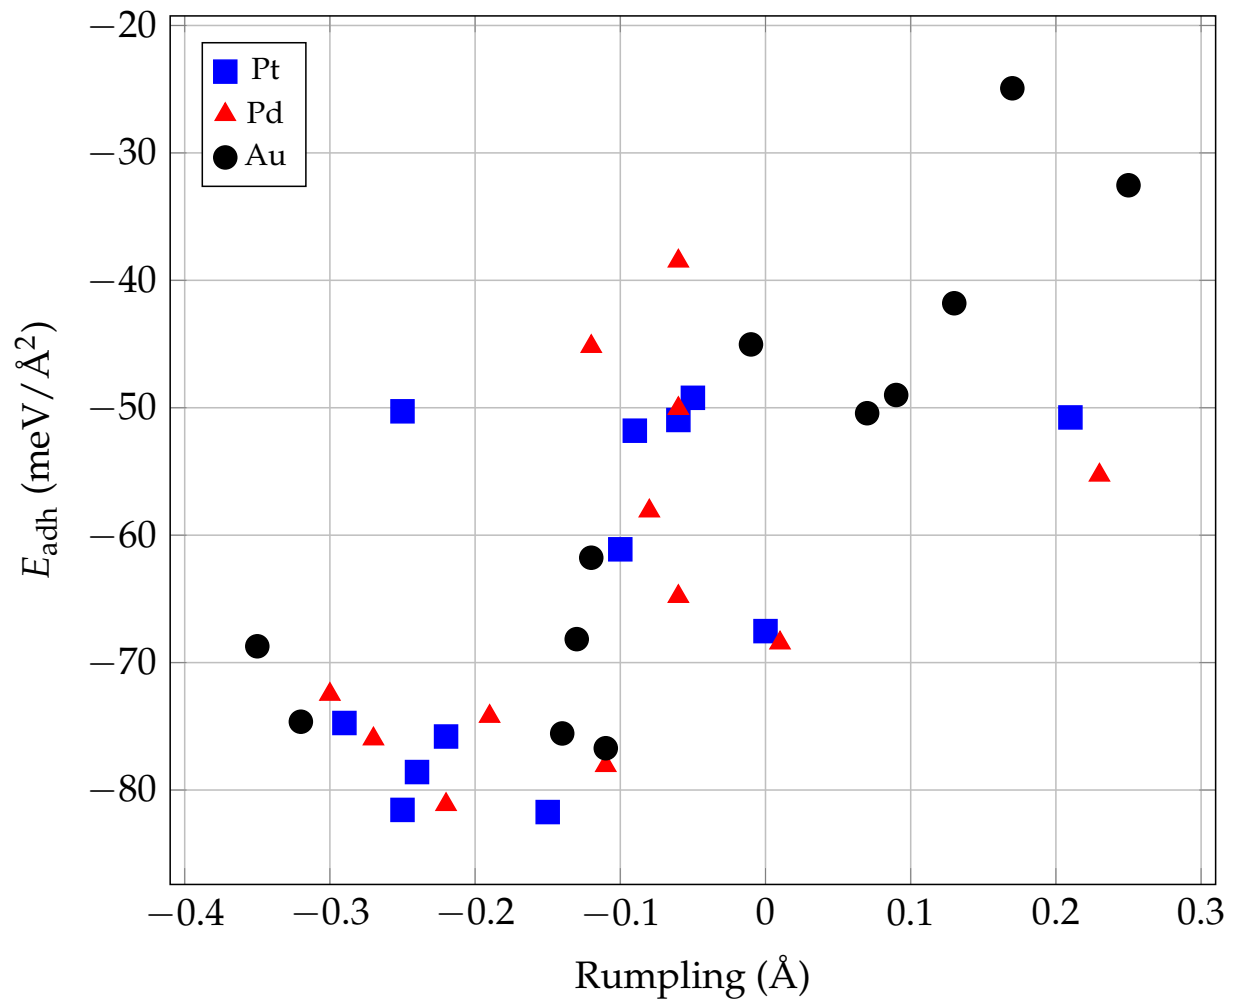

Figure S17: Plot of the adhesion energy ( $E_{adh}$ ) as a function of the rumpling ( $R$ ) for selected structures.

## Electronic properties

Density of states

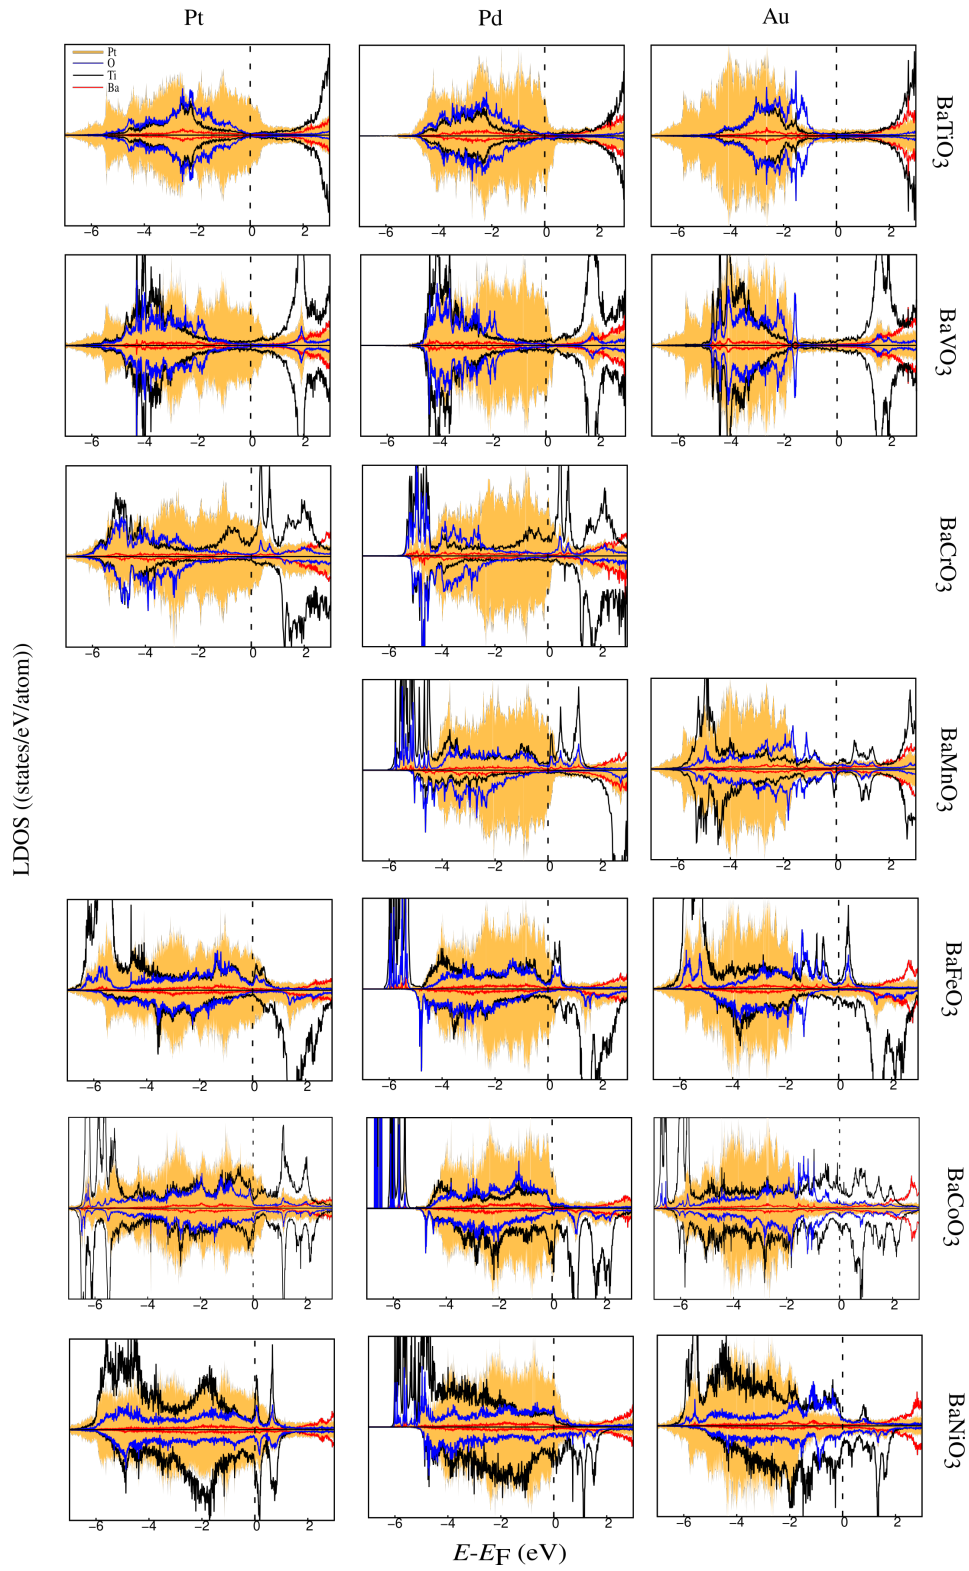

Figure S18: LDOS per atom for  $\text{BaBO}_3$  ( $B = \text{Ti, V, Cr, Mn, Fe, Co, Ni}$ ) with Pt, Pd, and Au substrates.  $Me$ , Ba,  $B$ , and O are represented by orange, red, black, and blue colors, respectively, as indicated in the top-left plot.

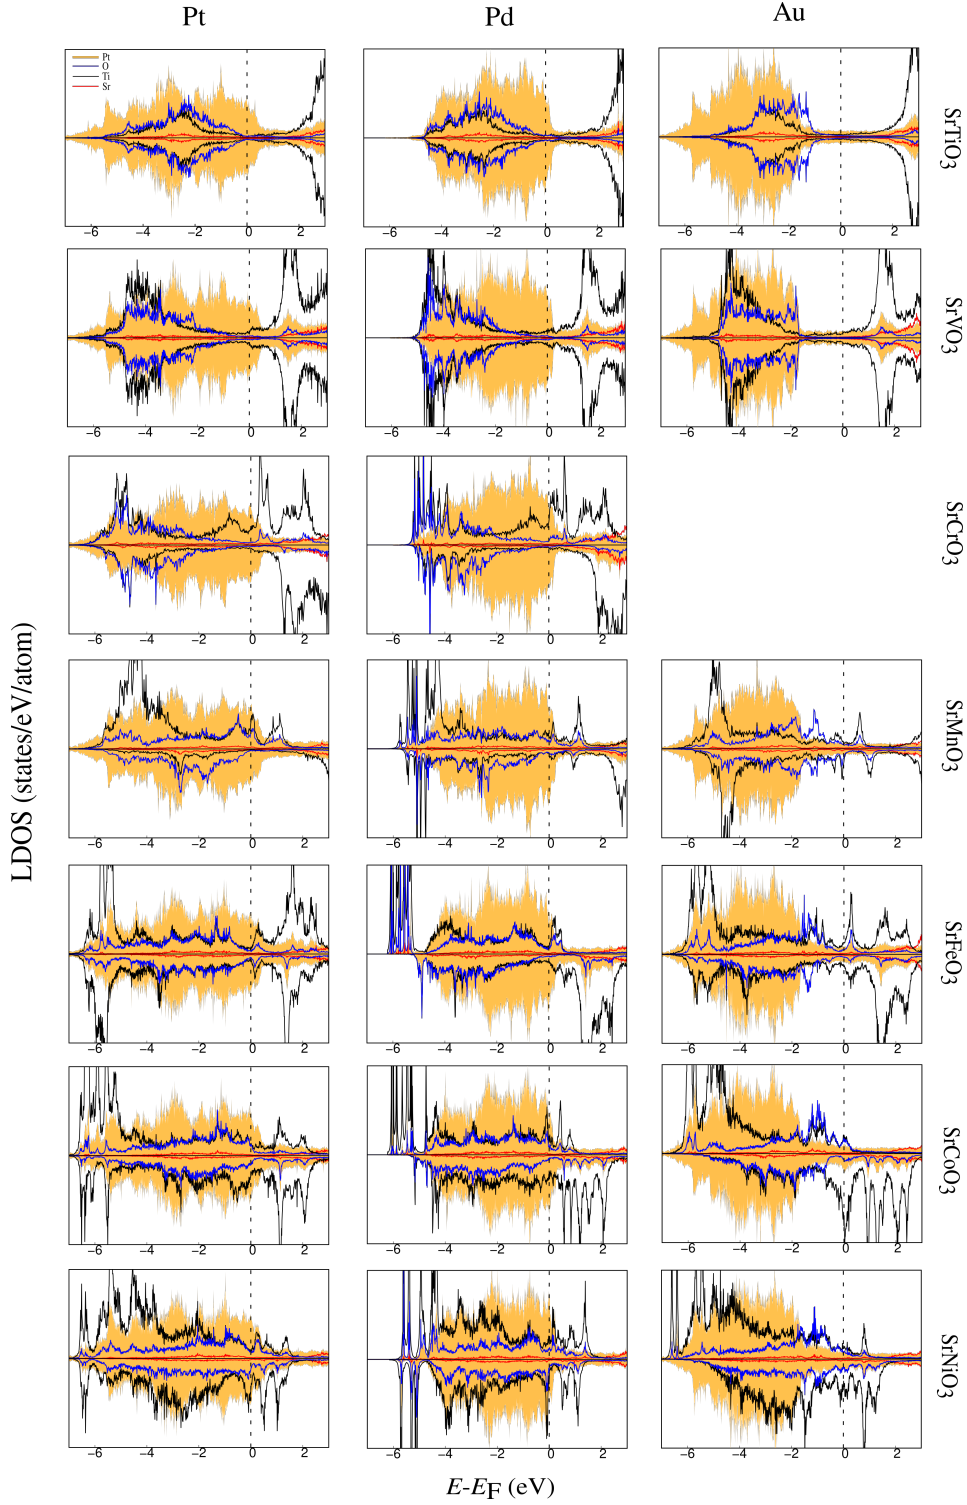

Figure S19: LDOS per atom for SrBO<sub>3</sub> ( $B = \text{Ti, V, Cr, Mn, Fe, Co, Ni}$ ) with Pt, Pd, and Au substrates.  $Me$ , Sr,  $B$ , and O are represented by orange, red, black, and blue colors, respectively, as indicated in the top-left plot.

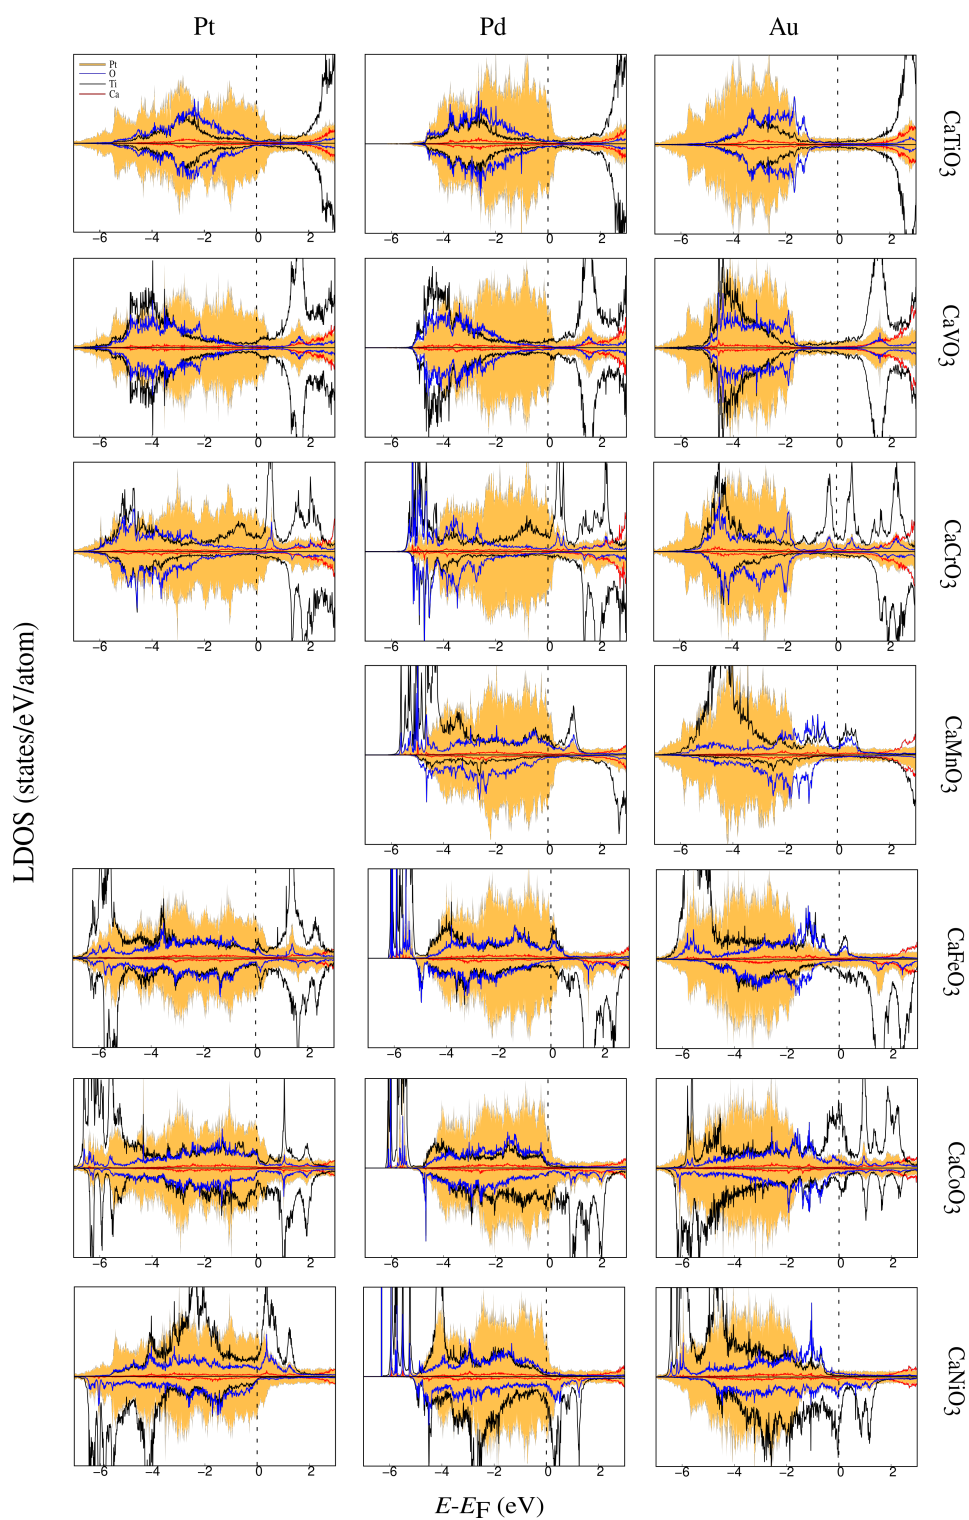

Figure S20: LDOS per atom for  $\text{CaBO}_3$  ( $B = \text{Ti, V, Cr, Mn, Fe, Co, Ni}$ ) with Pt, Pd, and Au substrates.  $\text{Me}$ ,  $\text{Ca}$ ,  $B$ , and  $\text{O}$  are represented by orange, red, black, and blue colors, respectively, as indicated in the top-left plot.



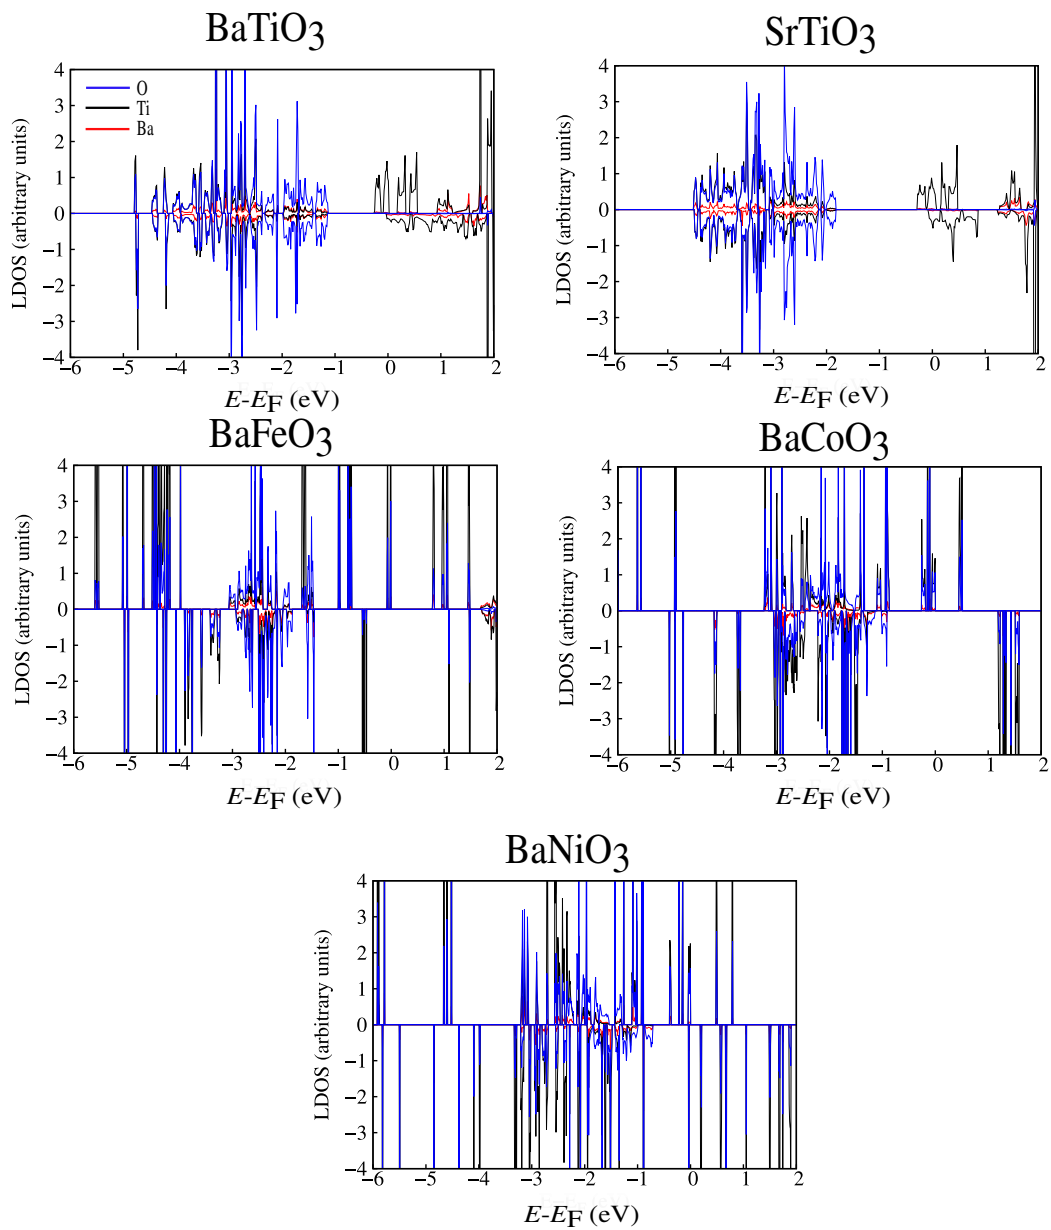

Figure S21: LDOS per atom for the oxide freestanding layers. Ba, B, and O are represented by red, black, and blue colors, respectively, as indicated in the top-left plot.

## COHP and ICOHPs

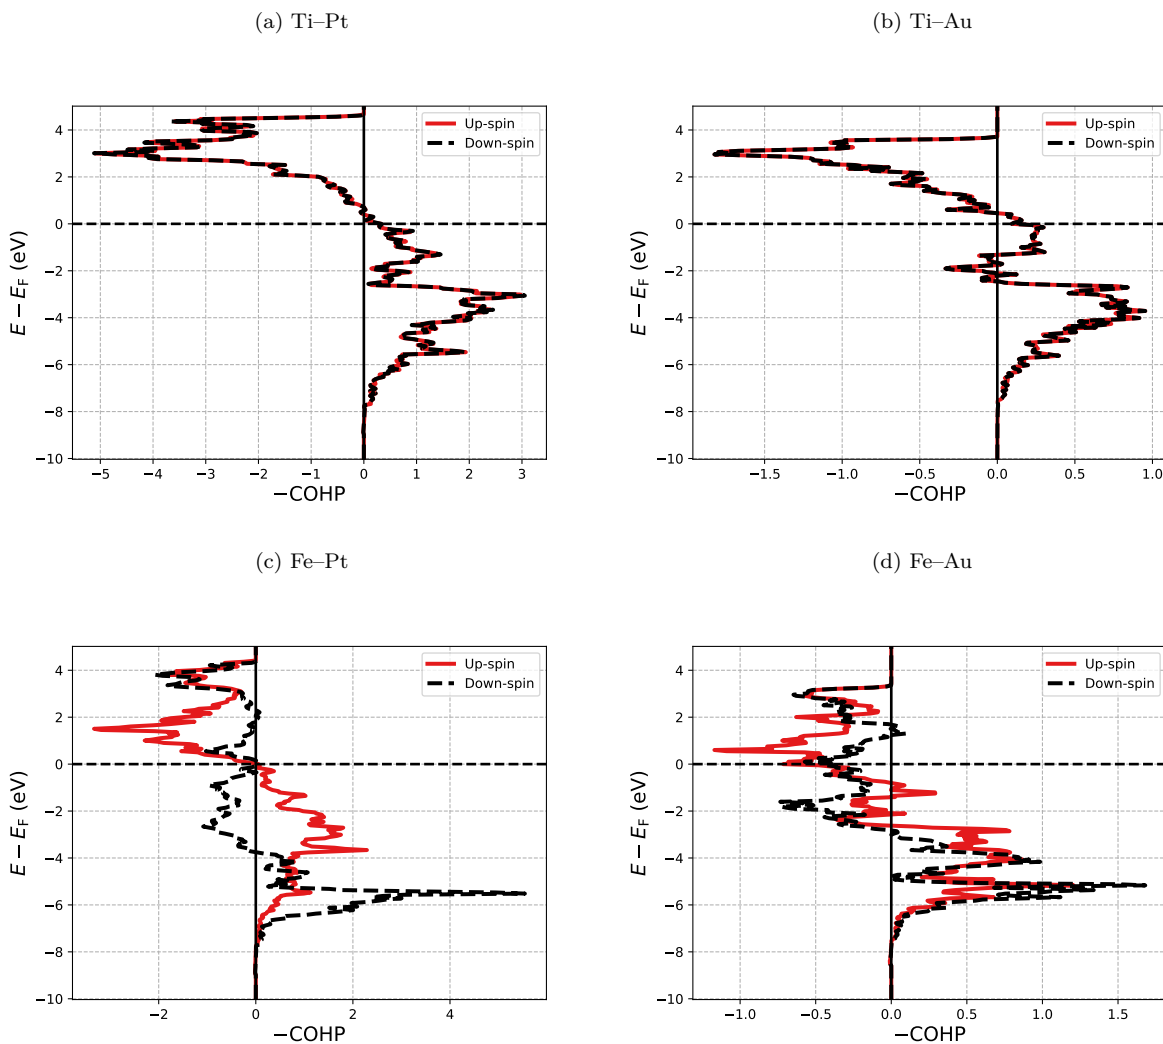

Figure S22: COHPs between all bonds up to  $3\text{\AA}$  in the  $\text{BaBO}_3/\text{Pt}(111)$  systems (with  $B = \text{Ti, Fe}$ ).

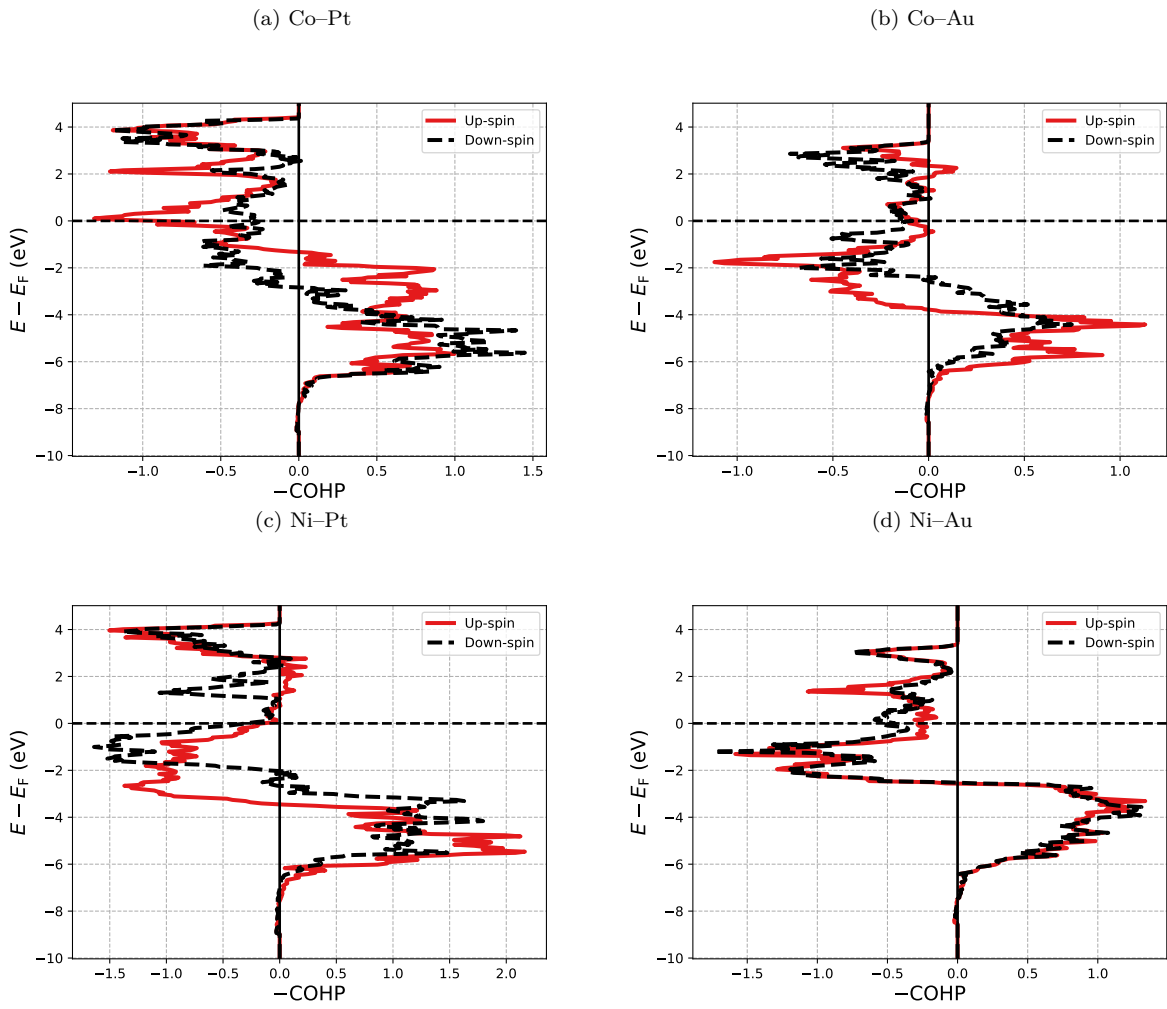

Figure S23: COHPs between all bonds up to  $3\text{\AA}$  in the  $\text{BaBO}_3/\text{Pt}(111)$  systems (with  $B = \text{Co}, \text{Ni}$ ).

(a) Ti-O (with Pt)

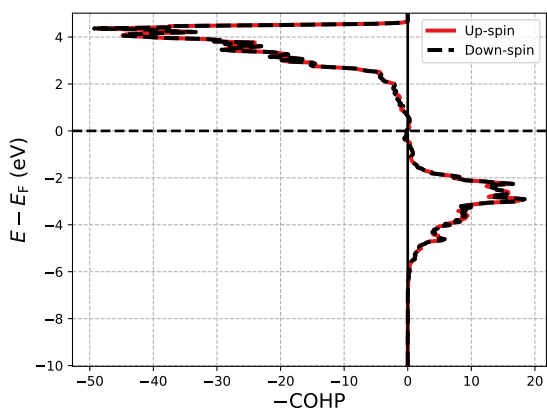

(b) Ti-O (with Au)

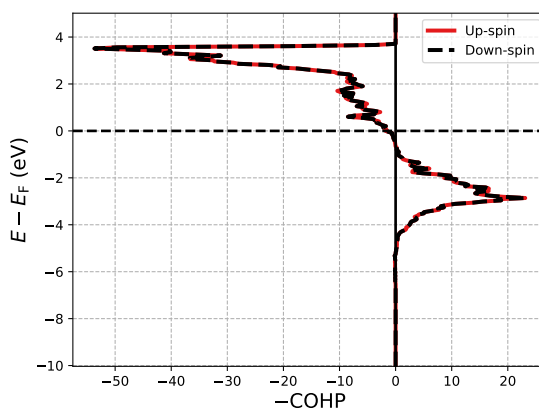

(c) Fe-O (with Pt)

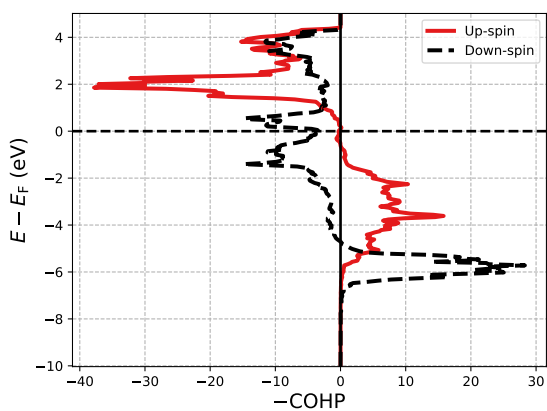

(d) Fe-O (with Au)

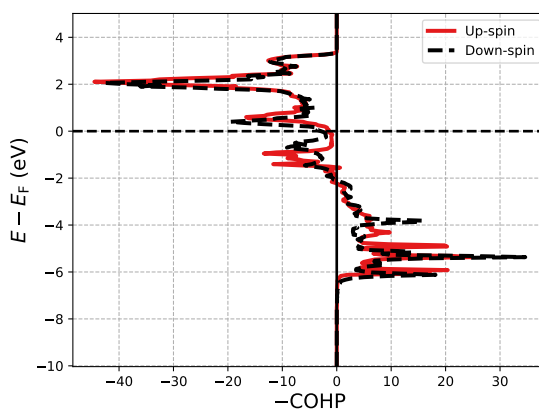Figure S24: COHPs between all bonds up to  $3\text{\AA}$  in the  $\text{BaBO}_3/\text{Me}(111)$  systems (with  $B = \text{Ti, Fe}$ ).

(a) Co-O (with Pt)

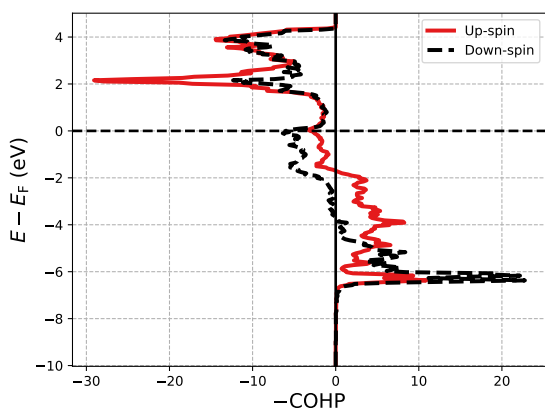

(b) Co-O (with Au)

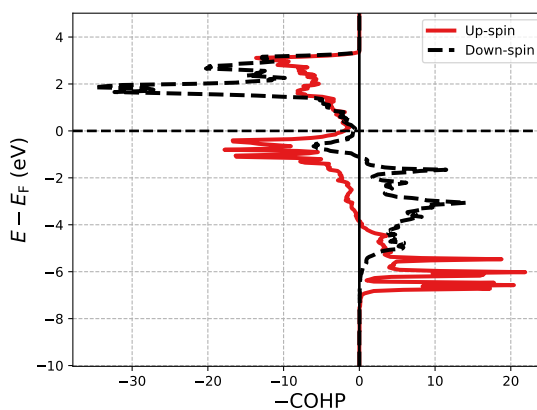

(c) Ni-O (with Pt)

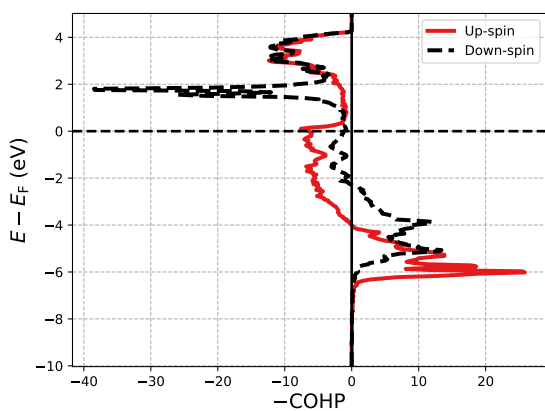

(d) Ni-O (with Au)

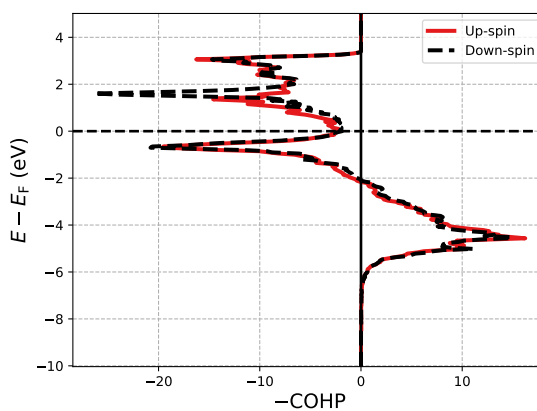Figure S25: COHPs between all bonds up to  $3\text{\AA}$  in the  $\text{BaBO}_3/\text{Pt}(111)$  systems (with  $B = \text{Co}, \text{Ni}$ ).

(a) Pt-O (with Ti)

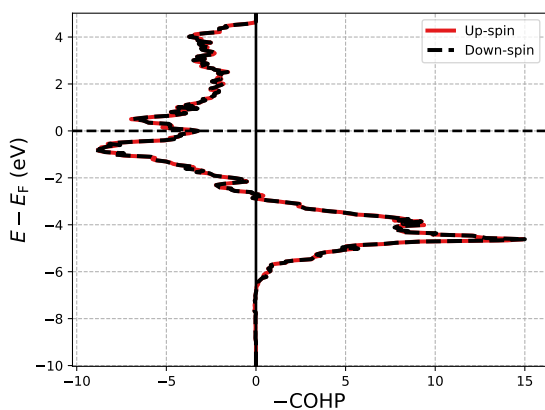

(b) Au-O (with Ti)

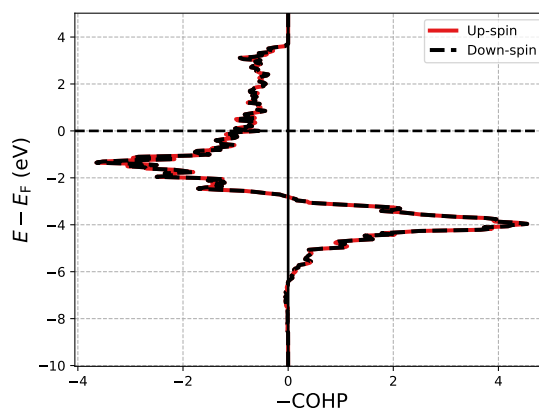

(c) Pt-O (with Fe)

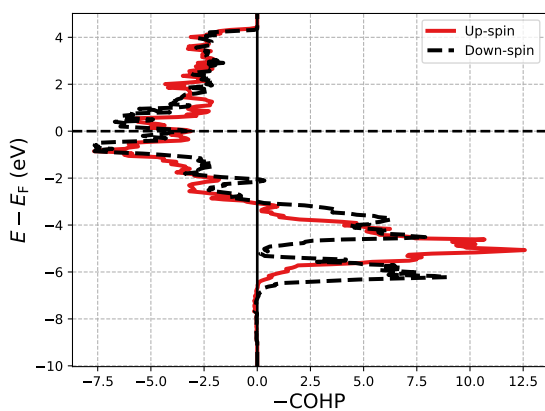

(d) Au-O (with Fe)

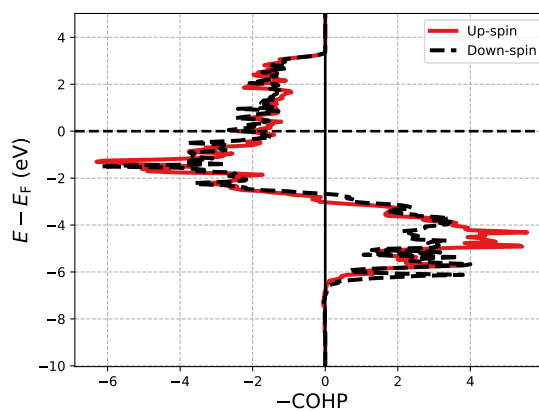Figure S26: COHPs between all bonds up to  $3\text{\AA}$  in the  $\text{BaBO}_3/\text{Me}(111)$  systems (with  $B = \text{Ti}, \text{Fe}$ ).

(a) Pt-O (with Co)

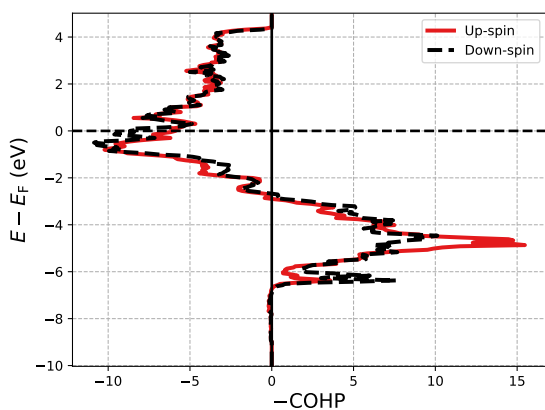

(b) Au-O (with Co)

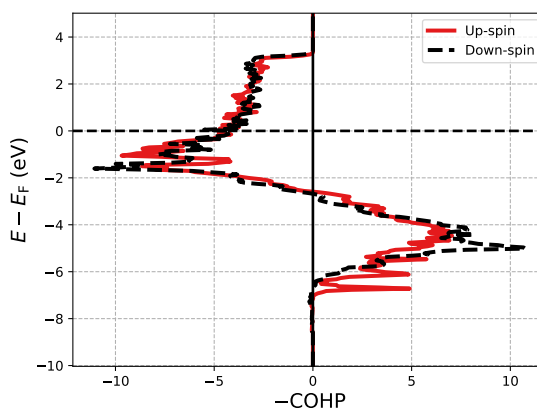

(c) Pt-O (with Ni)

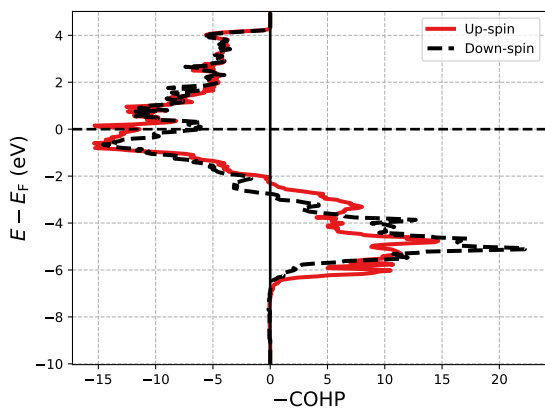

(d) Au-O (with Ni)

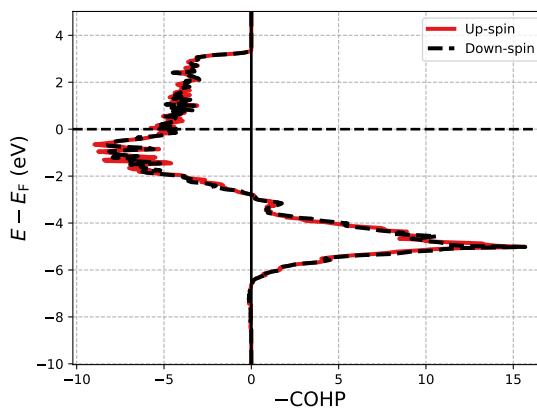Figure S27: COHPs between all bonds up to  $3\text{\AA}$  in the  $\text{BaBO}_3/\text{Pt}(111)$  systems (with  $B = \text{Co}, \text{Ni}$ ).

## Elemental metals and bulk perovskites

Table S9: Lattice parameters, space groups, cohesive energies of the metals taken as references to calculate the formation enthalpies of OQAs and SHSs.

| Metal | Structure            | $a$ (Å) | $c$ (Å) | Cohesive energy (eV/at.) | Ref.                |
|-------|----------------------|---------|---------|--------------------------|---------------------|
| Ba    | bcc ( $Im\bar{3}m$ ) | 4.99    |         | -1.91                    | this work           |
|       |                      | 5.03    |         | -1.88                    | PBE <sup>1</sup>    |
|       |                      | 5.01    |         | -1.91                    | exp. <sup>2,3</sup> |
| Sr    | fcc ( $Fm\bar{3}m$ ) | 6.02    |         | -1.57                    | this work           |
|       |                      | 6.02    |         | -1.62                    | PBE <sup>1</sup>    |
|       |                      | 6.08    |         | -1.73                    | exp. <sup>3,4</sup> |
| Ti    | hcp ( $P6_3mmc$ )    | 2.93    | 4.64    | -5.17                    | this work           |
|       |                      | 2.95    | 4.68    | -5.47                    | PBE <sup>1,5</sup>  |
|       |                      | 2.93    | 4.67    | -5.45                    | PBE <sup>6</sup>    |
|       |                      | 2.95    | 4.68    | -4.85                    | exp. <sup>3,4</sup> |
| V     | bcc ( $Im\bar{3}m$ ) | 2.98    |         | -5.45                    | this work           |
|       |                      | 3.00    |         | -5.92                    | PBE <sup>1</sup>    |
|       |                      | 2.98    |         | -6.03                    | PBE <sup>6</sup>    |
|       |                      | 3.03    |         | -5.31                    | exp. <sup>3,4</sup> |
| Fe    | bcc ( $Im\bar{3}m$ ) | 2.83    |         | -4.97                    | this work           |
|       |                      | 2.83    |         | -4.32                    | PBE <sup>6</sup>    |
|       |                      | 2.83    |         | -4.85                    | PBE <sup>1</sup>    |
|       |                      | 2.86    |         | -4.28                    | exp. <sup>3,4</sup> |
| Co    | hcp ( $P6_3mmc$ )    | 2.50    | 4.02    | -4.89                    | this work           |
|       |                      | 2.49    | 4.01    | -4.44                    | PBE <sup>6</sup>    |
|       |                      | 2.50    | 4.09    | -5.14                    | PBE <sup>1</sup>    |
|       |                      | 2.51    | 4.07    | -4.39                    | exp. <sup>3,7</sup> |
| Ni    | fcc ( $Fm\bar{3}m$ ) | 3.53    |         | -4.75                    | this work           |
|       |                      | 3.52    |         | -4.48                    | PBE <sup>6</sup>    |
|       |                      | 3.52    |         | -4.83                    | PBE <sup>1</sup>    |
|       |                      | 3.92    |         | -4.44                    | exp. <sup>3,4</sup> |
| Pt    | fcc ( $Fm\bar{3}m$ ) | 3.99    |         | -5.63                    | this work           |
|       |                      | 3.95    |         | -5.87                    | PBE <sup>6</sup>    |
|       |                      | 3.98    |         | -5.32                    | PBE <sup>1</sup>    |
|       |                      | 3.92    |         | -5.84                    | exp. <sup>3,4</sup> |
| Au    | fcc ( $Fm\bar{3}m$ ) | 4.18    |         | -3.18                    | this work           |
|       |                      | 4.17    |         | -3.83                    | PBE <sup>6</sup>    |
|       |                      | 4.16    |         | -3.11                    | PBE <sup>1</sup>    |
|       |                      | 4.07    |         | -3.81                    | exp. <sup>3,4</sup> |



Table S10: Lattice parameters, space groups and formation enthalpies of perovskites considered in the thermodynamic model.

| Perovskite         | Structure    | $a$ (Å)                       | $b$ (Å) | $c$ (Å) | Formation enthalpy (eV/at.) | Ref.             |
|--------------------|--------------|-------------------------------|---------|---------|-----------------------------|------------------|
| BaTiO <sub>3</sub> | $Pm\bar{3}m$ | 4.05                          |         |         | -3.35                       | this work        |
|                    | $R\bar{3}m$  | 4.08 ( $\alpha=89.67^\circ$ ) |         |         | -3.50                       | PBE <sup>8</sup> |
| SrTiO <sub>3</sub> | $Pm\bar{3}m$ | 3.96                          |         |         | -3.38                       | this work        |
|                    | $Pm\bar{3}m$ | 3.94                          |         |         | -3.56                       | PBE <sup>8</sup> |
| BaFeO <sub>3</sub> | $Pm\bar{3}m$ | 4.01                          |         |         | -2.07                       | this work        |
|                    | $Pm\bar{3}m$ | 4.03                          |         |         | -2.25                       | PBE <sup>8</sup> |
| BaCoO <sub>3</sub> | $Cmcm$       | 5.70                          | 9.99    | 4.81    | -1.83                       | this work        |
|                    | $P6_3mmc$    | 5.74                          |         | 5.77    | -2.11                       | PBE <sup>8</sup> |
| BaNiO <sub>3</sub> | $P6_3mmc$    | 5.71                          |         | 4.80    | -1.48                       | this work        |
|                    | $P6_3mmc$    | 5.72                          |         | 4.83    | -1.48                       | PBE <sup>8</sup> |

## Magnetic stability

Table S11: Magnetic stability considering, as the initial magnetic moment, a ferromagnetic (FM) and an antiferromagnetic (AFM) state of the  $B$  ( $B = \text{Cr, Mn, Fe, Co, Ni}$ ) elements in the approximant structure. Since there are four  $B$  atoms in the approximant with two equivalent positions, we consider the initial AFM state with the  $m_B$  of the non-equivalent positions in opposite directions. RMS = Resulting magnetic moment; IMC = Initial magnetic configuration; SIC = Stable as initial configuration.

| Formula                                                           | Energy FM (eV/at.) | Energy AFM (eV/at.) | RMC (IMC = FM) | RMS (IMC = AFM) | $\bar{m}_B$ ( $\mu_B$ ) (IMS = FM) | $\bar{m}_B$ ( $\mu_B$ ) (IMS = AFM) | SIC |
|-------------------------------------------------------------------|--------------------|---------------------|----------------|-----------------|------------------------------------|-------------------------------------|-----|
| Pt <sub>120</sub> Ba <sub>5</sub> Cr <sub>4</sub> O <sub>12</sub> | -3.15717           | -3.15781            | FM             | AFM             | 1.09                               | -0.03                               | AFM |
| Pt <sub>120</sub> Ba <sub>5</sub> Fe <sub>4</sub> O <sub>12</sub> | -3.09922           | -3.09826            | FM             | AFM             | 3.32                               | -0.12                               | FM  |
| Pt <sub>120</sub> Ba <sub>5</sub> Co <sub>4</sub> O <sub>12</sub> | -3.02495           | -3.02418            | AFM            | FM              | 0.04                               | -2.69                               | FM  |
| Pt <sub>120</sub> Ba <sub>5</sub> Ni <sub>4</sub> O <sub>12</sub> | -2.98047           | -2.96809            | FM             | AFM             | 0.59                               | -0.67                               | FM  |
| Pt <sub>120</sub> Sr <sub>5</sub> Cr <sub>4</sub> O <sub>12</sub> | -3.13384           | -3.13454            | FM             | FM              | 1.16                               | 1.17                                | AFM |
| Pt <sub>120</sub> Sr <sub>5</sub> Fe <sub>4</sub> O <sub>12</sub> | -3.07669           | -3.07763            | AFM            | AFM             | -0.12                              | -0.14                               | AFM |
| Pt <sub>120</sub> Sr <sub>5</sub> Co <sub>4</sub> O <sub>12</sub> | -2.99597           | -2.99534            | AFM            | AFM             | -0.04                              | -0.04                               | FM  |
| Pt <sub>120</sub> Sr <sub>5</sub> Ni <sub>4</sub> O <sub>12</sub> | -2.9303            | -2.95691            | AFM            | AFM             | 0.69                               | 0.32                                | AFM |
| Pt <sub>120</sub> Ca <sub>5</sub> Fe <sub>4</sub> O <sub>12</sub> | -3.08253           | -3.08354            | AFM            | AFM             | -0.26                              | -0.2                                | AFM |
| Pt <sub>120</sub> Ca <sub>5</sub> Co <sub>4</sub> O <sub>12</sub> | -3.0078            | -3.00612            | AFM            | AFM             | -0.11                              | -0.11                               | FM  |
| Pt <sub>120</sub> Ca <sub>5</sub> Ni <sub>4</sub> O <sub>12</sub> | -2.95689           | -2.9563             | AFM            | FM              | 0.03                               | 1.44                                | FM  |
| Pd <sub>120</sub> Ba <sub>5</sub> Cr <sub>4</sub> O <sub>12</sub> | -2.08172           | /                   | AFM            | /               | 0.59                               | /                                   | FM  |
| Pd <sub>120</sub> Ba <sub>5</sub> Mn <sub>4</sub> O <sub>12</sub> | -2.01345           | /                   | AFM            | /               | 0.92                               | /                                   | FM  |
| Pd <sub>120</sub> Ba <sub>5</sub> Fe <sub>4</sub> O <sub>12</sub> | -2.02899           | -2.03089            | FM             | FM              | 3.58                               | 3.58                                | AFM |
| Pd <sub>120</sub> Ba <sub>5</sub> Co <sub>4</sub> O <sub>12</sub> | -1.95797           | -1.95604            | FM             | FM              | 2.57                               | -2.57                               | FM  |
| Pd <sub>120</sub> Ba <sub>5</sub> Ni <sub>4</sub> O <sub>12</sub> | -1.89289           | -1.9067             | FM             | AFM             | 1.49                               | -0.03                               | AFM |
| Pd <sub>120</sub> Sr <sub>5</sub> Cr <sub>4</sub> O <sub>12</sub> | -2.05863           | -2.05942            | FM             | FM              | 1.21                               | 1.23                                | AFM |
| Pd <sub>120</sub> Sr <sub>5</sub> Fe <sub>4</sub> O <sub>12</sub> | -2.01027           | -2.01489            | FM             | FM              | 3.47                               | 3.76                                | AFM |
| Pd <sub>120</sub> Sr <sub>5</sub> Co <sub>4</sub> O <sub>12</sub> | -1.94105           | /                   | FM             | /               | 2.59                               | /                                   | FM  |
| Pd <sub>120</sub> Sr <sub>5</sub> Ni <sub>4</sub> O <sub>12</sub> | -1.88425           | -1.88285            | FM             | AFM             | -0.48                              | 0.4                                 | FM  |
| Pd <sub>120</sub> Ca <sub>5</sub> Cr <sub>4</sub> O <sub>12</sub> | -2.072             | /                   | FM             | /               | 1.14                               | /                                   | FM  |
| Pd <sub>120</sub> Ca <sub>5</sub> Fe <sub>4</sub> O <sub>12</sub> | -2.01331           | -2.01448            | FM             | AFM             | 3.5                                | 0.26                                | AFM |
| Pd <sub>120</sub> Ca <sub>5</sub> Co <sub>4</sub> O <sub>12</sub> | -1.93052           | -1.93402            | AFM            | AFM             | 1.04                               | 0.12                                | AFM |
| Pd <sub>120</sub> Ca <sub>5</sub> Ni <sub>4</sub> O <sub>12</sub> | -1.89952           | -1.89853            | AFM            | FM              | 0.7                                | 1.45                                | FM  |
| Au <sub>120</sub> Ba <sub>5</sub> Mn <sub>4</sub> O <sub>12</sub> | -0.72306           | /                   | AFM            | /               | 1.77                               | /                                   | FM  |
| Au <sub>120</sub> Ba <sub>5</sub> Fe <sub>4</sub> O <sub>12</sub> | -0.72789           | -0.73004            | AFM            | FM              | -0.0                               | 3.4                                 | AFM |
| Au <sub>120</sub> Ba <sub>5</sub> Co <sub>4</sub> O <sub>12</sub> | -0.6368            | -0.6345             | FM             | FM              | -2.77                              | 2.76                                | FM  |
| Au <sub>120</sub> Ba <sub>5</sub> Ni <sub>4</sub> O <sub>12</sub> | -0.56556           | -0.57633            | FM             | AFM             | 1.17                               | -0.05                               | AFM |
| Au <sub>120</sub> Sr <sub>5</sub> Fe <sub>4</sub> O <sub>12</sub> | -0.69417           | -0.69365            | AFM            | AFM             | 1.5                                | -0.03                               | FM  |
| Au <sub>120</sub> Sr <sub>5</sub> Co <sub>4</sub> O <sub>12</sub> | -0.61276           | -0.61436            | FM             | AFM             | -2.41                              | -0.11                               | AFM |
| Au <sub>120</sub> Sr <sub>5</sub> Ni <sub>4</sub> O <sub>12</sub> | -0.56751           | -0.56264            | FM             | AFM             | 0.44                               | -0.01                               | FM  |
| Au <sub>120</sub> Ca <sub>5</sub> Cr <sub>4</sub> O <sub>12</sub> | -0.75502           | /                   | AFM            | /               | 0.65                               | /                                   | FM  |
| Au <sub>120</sub> Ca <sub>5</sub> Fe <sub>4</sub> O <sub>12</sub> | -0.70948           | -0.70957            | FM             | AFM             | 3.65                               | 0.17                                | AFM |
| Au <sub>120</sub> Ca <sub>5</sub> Co <sub>4</sub> O <sub>12</sub> | -0.61741           | -0.61429            | AFM            | FM              | -1.33                              | 2.66                                | FM  |
| Au <sub>120</sub> Ca <sub>5</sub> Ni <sub>4</sub> O <sub>12</sub> | -0.56905           | /                   | FM             | /               | 1.24                               | /                                   | FM  |

## References

- (1) Lejaeghere, K.; Speybroeck, V. V.; Oost, G. V.; Cottenier, S. Error estimates for solid-state density-functional theory predictions: an overview by means of the ground-state elemental crystals. *Critical Reviews in Solid State and Materials Sciences* **2014**, *39*, 1–24.
- (2) Barrett, C. S. The crystal structure of barium and europium at 293, 78 and 5 K. *Journal of Chemical Physics* **1956**, *25*, 1123–1124.
- (3) Kittel, C. *Introduction to Solid State Physics*, 7th ed.; John Wiley & Sons: USA, 1996.
- (4) Villars, P.; Calvert, L. D. *Pearson's Handbook of Crystallographic Data for Intermetallic Phases*; ASM International: Metals Park, Ohio, USA, 1998.
- (5) Spreadborough, J.; Christian, J. The measurement of the lattice expansions and Debye temperatures of titanium and silver by X-ray methods. *Proceedings of the Physical Society (1958-1967)* **1959**, *74*, 609.
- (6) Janthon, P.; Luo, S.; Kozlov, S. M.; Vines, F.; Limtrakul, J.; Truhlar, D. G.; Illas, F. Bulk Properties of Transition Metals: A Challenge for the Design of Universal Density Functionals. *J. Chem. Theory Comput.* **2014**, *10*, 3832–3839.
- (7) Hofer, L. J. E.; Peebles, W. C. Preparation and X-Ray Diffraction Studies of A New Cobalt Carbide. *J. Am. Chem. Soc.* **1947**, *69*, 893–899.
- (8) Jain, A.; Hautier, S. P. O. G.; Chen, W.; Richards, W. D.; Dacek, W.; Cholia, S.; Gunter, D.; Skinner, D.; Ceder, G.; Persson, K. A. Commentary: The Materials Project: A materials genome approach to accelerating materials innovation. *APL Mater.* **2013**, *1*, 011002.

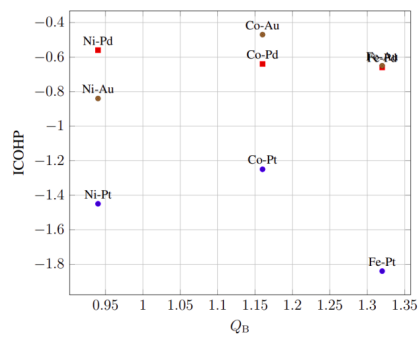

(a)

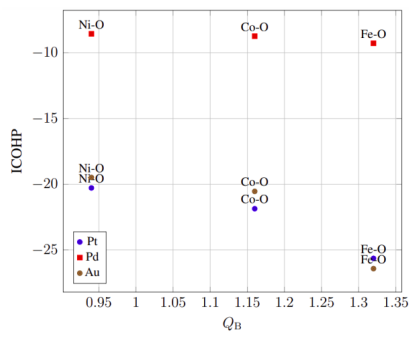

(b)

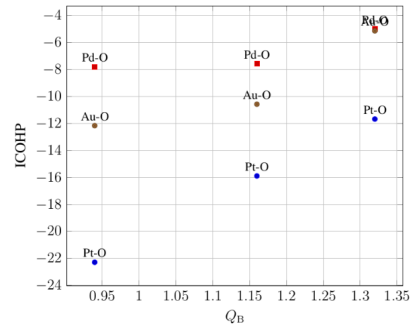

(c)

Fig.S30 : ICOHP (eV) as a function of the Bader charge on the transition metal ( $Q_B$ ) : TM-substrate bonds (a), TM-O bonds (b) and substrate-O bonds (c)
